# Supplementary material for: Gremlin-2 is a BMP antagonist that is regulated by the circadian clock
Source: PubMed Central journal article supplement (PMC4046123; doi:10.1038/srep05183), 2014-06-05
Supplement: srep05183-s1.pdf [file srep05183-s1.pdf]

Gremlin-2 is a BMP antagonist that is regulated by the circadian clock

Ching-Yan Chloé Yeung<sup>1,2</sup>, Nicole Gossan<sup>1,2</sup>, Yinhui Lu<sup>1,2</sup>, Alun Hughes<sup>2</sup>, James J. Hensman<sup>3</sup>, Monika L. Bayer<sup>4</sup>, Michael Kjær<sup>4</sup>, Karl E. Kadler<sup>1,2\*</sup> and Qing-Jun Meng<sup>1,2\*</sup>

<sup>1</sup>*Wellcome Trust Centre for Cell-Matrix Research, <sup>2</sup>Faculty of Life Sciences, University of Manchester, Oxford Road, Manchester M13 9PT, United Kingdom,*

<sup>3</sup>*Department of Computer Science, University of Sheffield, Sheffield S1 4DP, United Kingdom,*

<sup>4</sup>*Institute of Sports Medicine, Department of Orthopedic Surgery M, Bispebjerg Hospital, and Center for Healthy Aging, Faculty of Health Sciences, University of Copenhagen, 2400 Copenhagen, Denmark*

# Supplementary 1

..... Null Component      — Alternative Component      — Mixture

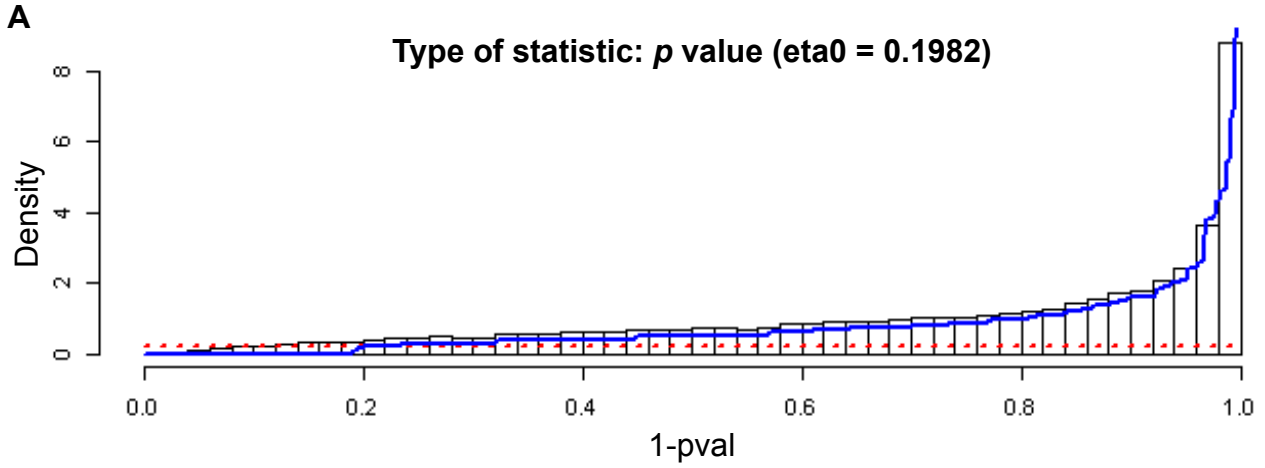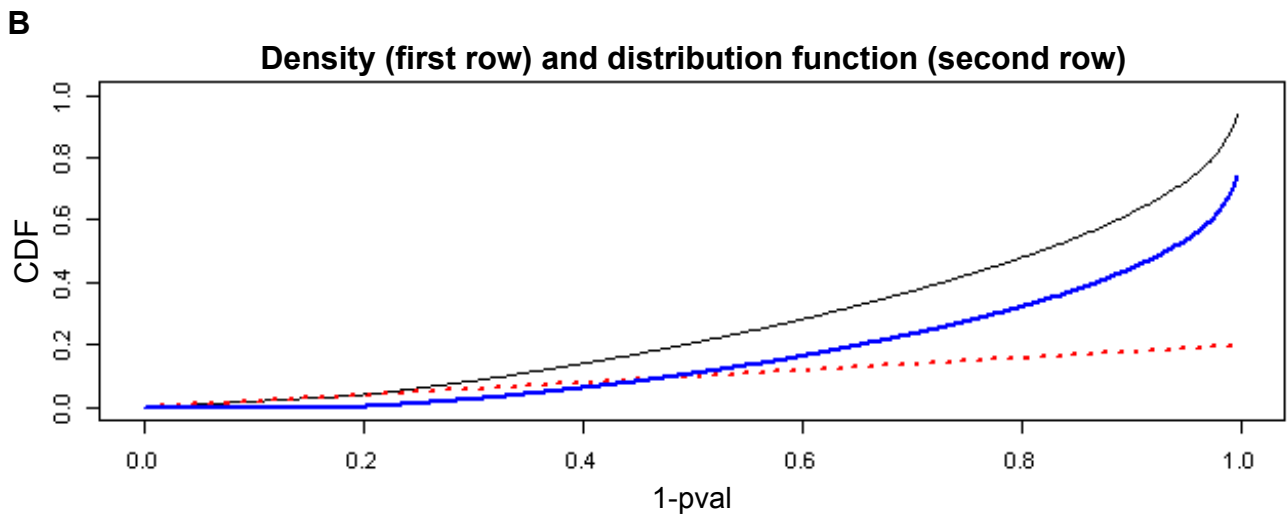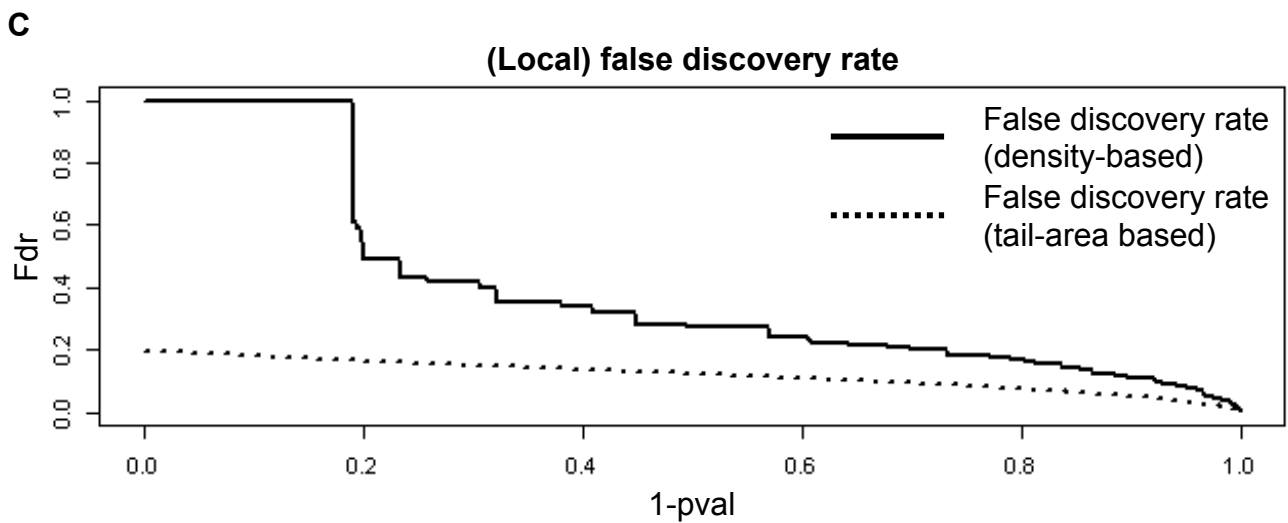

## Supplementary 2

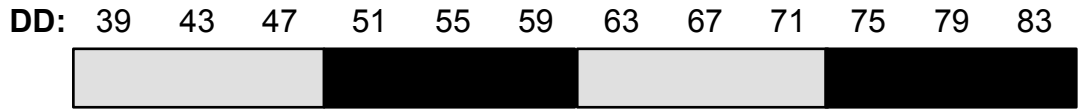

CT: 3 7 11 15 19 23 3 7 11 15 19 23

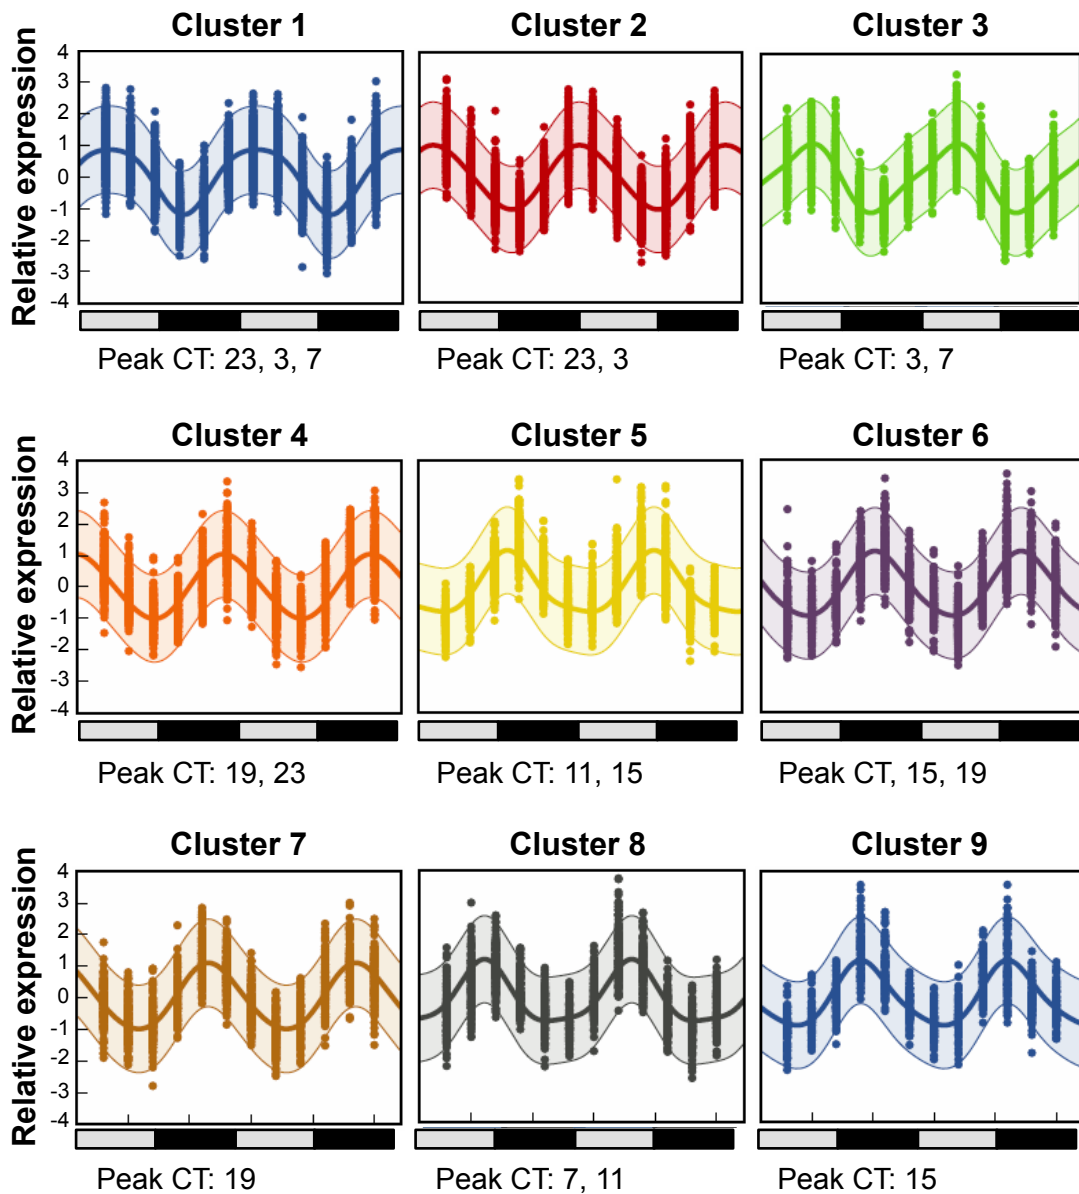

## Supplementary 3

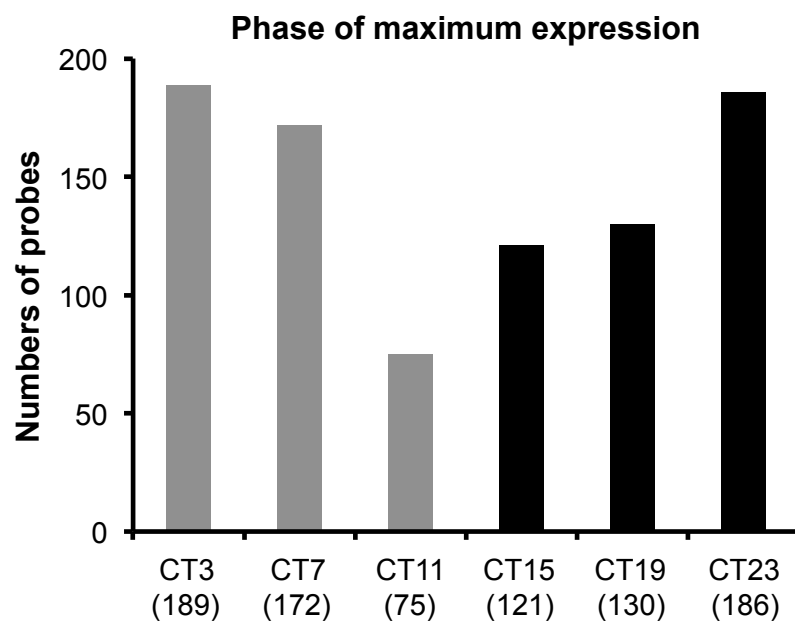

# Supplementary Figure 4

pSmad1/5

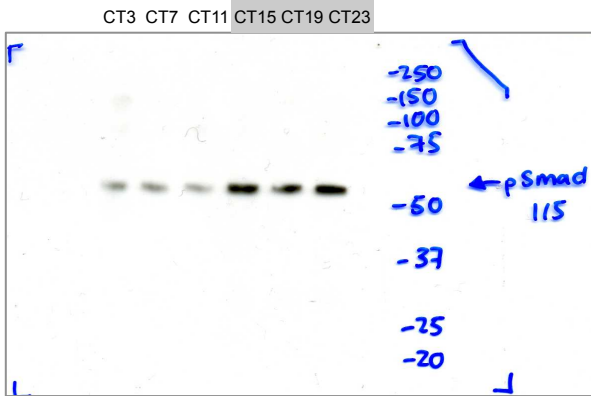

Total Smad1

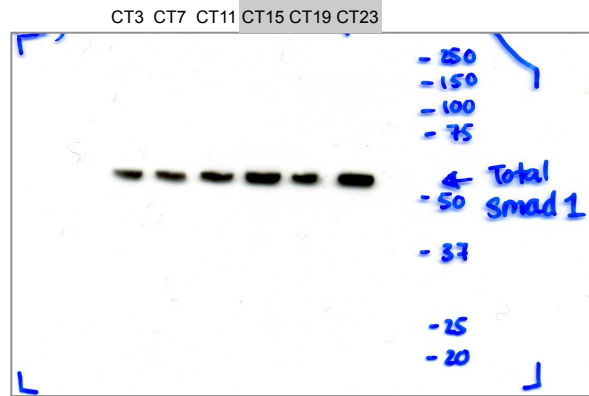

Total Smad5

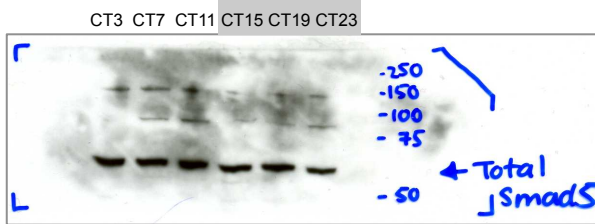

pSmad2

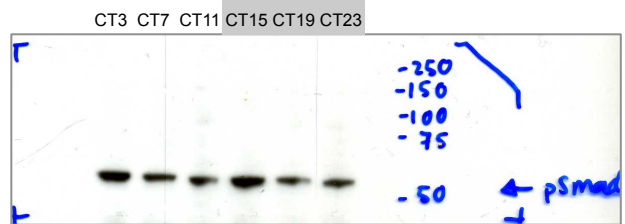

Total Smad2

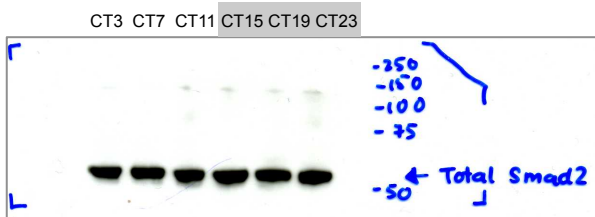

GAPDH

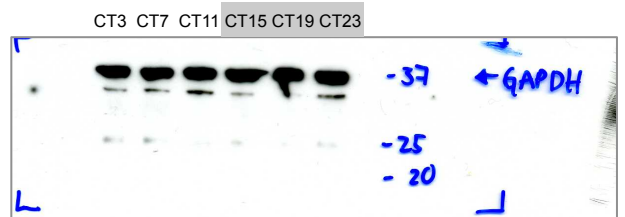

## Supplementary Figure 5

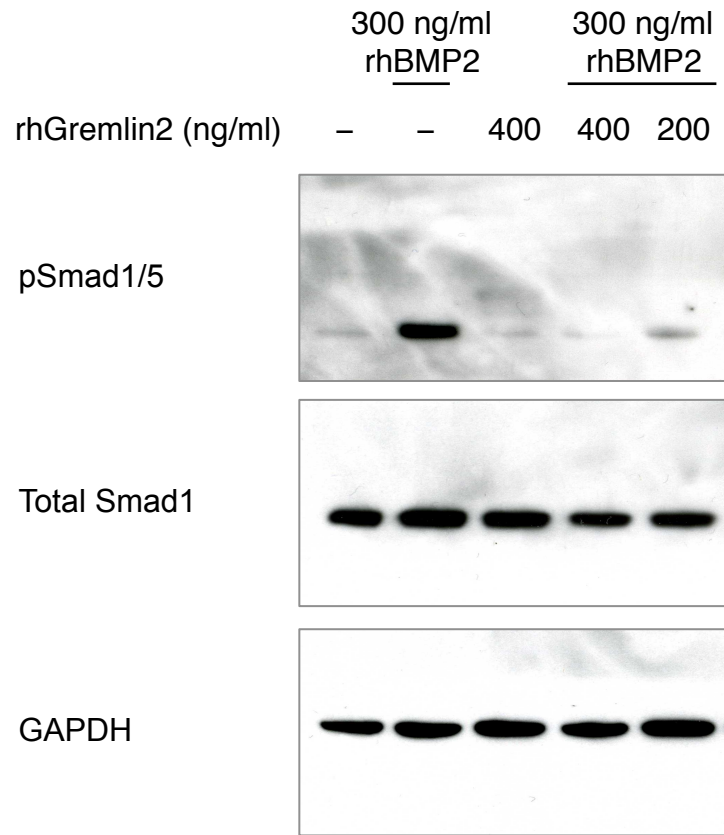

| <b>Mouse Gene</b> | <b>Forward primer</b>      | <b>Reverse primer</b>      | <b>Product size (bp)</b> |
|-------------------|----------------------------|----------------------------|--------------------------|
| <i>Bmal1</i>      | 5'-CGAAGACAATGAGCCAGACA-3' | 5'-AAATAGCTGTCCGCTCTGA-3'  | 185                      |
| <i>Clock</i>      | 5'-TGCCAGCTCATGAAAAGATG-3' | 5'-CGCTGCTCTAGCTGGTCTTT-3' | 199                      |
| <i>GAPDH</i>      | 5'-AACTTTGGCATTGTGGAAGG-3' | 5'-ACACATTGGGGGTAGGAACA-3' | 223                      |
| <i>Grem2</i>      | 5'-AGGCTTCCATCTCGTCATTG-3' | 5'-TGCACCAGTCACTCTTGAGG-3' | 244                      |
| <i>Nr1d1</i>      | 5'-CTTCCGTGACCTTTCTCAGC-3' | 5'-GGTAAGTGCCAGGGAGTTGA-3' | 223                      |
|                   |                            |                            |                          |
| <b>Human Gene</b> | <b>Forward primer</b>      | <b>Reverse primer</b>      | <b>Product size (bp)</b> |
| <i>Bmal1</i>      | 5'-TGGATGAAGACAACGAACCA-3' | 5'-AGCTGTTGCCCTCTGGTCTA-3' | 185                      |
| <i>Clock</i>      | 5'-GGCTGAAAGACGACGAGAAC-3' | 5'-GGTGTGAGGAAGGGTCTGA-3'  | 210                      |
| <i>GAPDH</i>      | 5'-GAGTCAACGGATTTGGTCGT-3' | 5'-GACAAGCTTCCCGTTCTCAG-3' | 186                      |
| <i>Grem2</i>      | 5'-TTTCCCTGTCCTTGTCCTG-3'  | 5'-TGCACCAGTCACTCTTGAGG-3' | 207                      |
| <i>Nr1d1</i>      | 5'-CTGGGAGGATTTCTCCATGA-3' | 5'-TCACTGTCTGGTCTTCACG-3'  | 182                      |

**Supplementary Table 1.** Primers used for qPCR.

Supplementary Table 2. List of all rhythmic genes in tendon organized into clusters based on peak expression time.

| CLUSTER 1                    |                                                                                                                   |               |
|------------------------------|-------------------------------------------------------------------------------------------------------------------|---------------|
| AFFYMETRIX_3P<br>RIME_IVT_ID | Name                                                                                                              | Peak<br>phase |
| 1418403_at                   | a disintegrin and metallopeptidase domain 19 (meltrin beta); similar to metalloprotease-disintegrin meltrin beta  | 3             |
| 1434555_at                   | acidic (leucine-rich) nuclear phosphoprotein 32 family, member A                                                  | 3             |
| 1421918_at                   | acidic (leucine-rich) nuclear phosphoprotein 32 family, member A                                                  | 3             |
| 1415984_at                   | acyl-Coenzyme A dehydrogenase, medium chain                                                                       | 3             |
| 1435160_at                   | AHA1, activator of heat shock protein ATPase homolog 2 (yeast)                                                    | 3             |
| 1451083_s_at                 | alanyl-tRNA synthetase                                                                                            | 7             |
| 1455673_at                   | alkB, alkylation repair homolog 2 (E. coli)                                                                       | 3             |
| 1436538_at                   | ankyrin repeat domain 37                                                                                          | 3             |
| 1428063_at                   | ankyrin repeat domain 46                                                                                          | 3             |
| 1423957_at                   | apoptosis enhancing nuclease                                                                                      | 3             |
| 1426923_at                   | ArfGAP with FG repeats 1                                                                                          | 23            |
| 1455113_at                   | armadillo repeat containing 8                                                                                     | 3             |
| 1425914_a_at                 | armadillo repeat containing, X-linked 1                                                                           | 3             |
| 1426403_at                   | ARP1 actin-related protein 1 homolog B, cetractin beta (yeast)                                                    | 23            |
| 1428279_a_at                 | ataxin 7-like 1                                                                                                   | 3             |
| 1434026_at                   | ATPase, class I, type 8B, member 2                                                                                | 3             |
| 1447679_s_at                 | BMS1 homolog, ribosome assembly protein (yeast)                                                                   | 7             |
| 1439466_s_at                 | BUD31 homolog (yeast)                                                                                             | 3             |
| 1418954_at                   | calcium/calmodulin-dependent protein kinase kinase 1, alpha                                                       | 3             |
| 1455356_at                   | calmodulin regulated spectrin-associated protein 1; similar to calmodulin regulated spectrin-associated protein 1 | 23            |
| 1431930_x_at                 | cardiolipin synthase 1                                                                                            | 7             |
| 1424996_at                   | CASP8 and FADD-like apoptosis regulator pseudogene; CASP8 and FADD-like apoptosis regulator                       | 3             |
| 1418330_at                   | CCCTC-binding factor                                                                                              | 3             |
| 1435017_at                   | CDGSH iron sulfur domain 3                                                                                        | 7             |
| 1434097_at                   | cDNA sequence D10627                                                                                              | 23            |
| 1421963_a_at                 | cell division cycle 25 homolog B (S. pombe)                                                                       | 3             |
| 1460708_s_at                 | cell division cycle 42 homolog (S. cerevisiae); predicted gene 7407                                               | 3             |
| 1415724_a_at                 | cell division cycle 42 homolog (S. cerevisiae); predicted gene 7407                                               | 3             |
| 1434649_at                   | cerebral cavernous malformation 2 homolog (human)                                                                 | 3             |
| 1442678_at                   | coiled coil domain containing 28B                                                                                 | 3             |
| 1418543_s_at                 | coiled-coil domain containing 43                                                                                  | 7             |
| 1424831_at                   | copine II                                                                                                         | 23            |
| 1434923_at                   | COX19 cytochrome c oxidase assembly homolog (S. cerevisiae)                                                       | 3             |
| 1420827_a_at                 | cyclin G1                                                                                                         | 23            |
| 1416873_a_at                 | cyclin-dependent kinase 2                                                                                         | 7             |
| 1460645_at                   | cysteine and histidine-rich domain (CHORD)-containing, zinc-binding protein 1                                     | 3             |
| 1436270_at                   | cytochrome b5 domain containing 1; predicted gene 6685                                                            | 3             |
| 1429028_at                   | dedicator of cytokinesis 11                                                                                       | 3             |
| 1434846_at                   | DENN/MADD domain containing 4C                                                                                    | 23            |
| 1415745_a_at                 | Down syndrome critical region gene 3                                                                              | 3             |
| 1418649_at                   | EGL nine homolog 3 (C. elegans)                                                                                   | 3             |
| 1415863_at                   | eukaryotic translation initiation factor 4, gamma 2                                                               | 3             |
| 1434985_a_at                 | eukaryotic translation initiation factor 4A1                                                                      | 7             |
| 1418443_at                   | exportin 1, CRM1 homolog (yeast)                                                                                  | 7             |
| 1436185_at                   | expressed sequence AI314180                                                                                       | 7             |
| 1428541_at                   | family with sequence similarity 115, member A                                                                     | 3             |
| 1448678_at                   | family with sequence similarity 118, member A                                                                     | 23            |
| 1428353_at                   | forkhead box K2                                                                                                   | 3             |
| 1434320_at                   | general transcription factor IIIC, polypeptide 4                                                                  | 23            |
| 1448693_at                   | glycolipid transfer protein domain containing 1                                                                   | 3             |
| 1435032_at                   | golgi autoantigen, golgin subfamily b, macrogolgin 1                                                              | 3             |
| 1418492_at                   | gremlin 2 homolog, cysteine knot superfamily (Xenopus laevis)                                                     | 3             |
| 1460206_at                   | GRP1 (general receptor for phosphoinositides 1)-associated scaffold protein                                       | 23            |
| 1418917_at                   | heme binding protein 2                                                                                            | 3             |
| 1415751_at                   | heterochromatin protein 1, binding protein 3                                                                      | 3             |
| 1423051_at                   | heterogeneous nuclear ribonucleoprotein U                                                                         | 7             |
| 1455206_at                   | hypothetical protein C130006E23                                                                                   | 3             |
| 1426471_at                   | hypothetical protein LOC100044274; zinc finger protein 52                                                         | 3             |
| 1423197_a_at                 | hypothetical protein LOC100044423                                                                                 | 23            |
| 1440254_at                   | hypothetical protein LOC100045398                                                                                 | 3             |
| 1433470_a_at                 | inner membrane protein, mitochondrial                                                                             | 3             |
| 1454755_at                   | inositol 1,4,5-trisphosphate 3-kinase C                                                                           | 3             |
| 1434011_a_at                 | integrator complex subunit 5                                                                                      | 3             |
| 1418265_s_at                 | interferon regulatory factor 2                                                                                    | 23            |
| 1425280_at                   | leukocyte receptor cluster (LRC) member 1                                                                         | 23            |
| 1421153_at                   | lysyl oxidase-like 4                                                                                              | 7             |
| 1429720_at                   | MAK10 homolog, amino-acid N-acetyltransferase subunit, (S. cerevisiae)                                            | 3             |
| 1429108_at                   | male-specific lethal 2 homolog (Drosophila)                                                                       | 7             |
| 1434746_at                   | MAX gene associated                                                                                               | 3             |
| 1428979_at                   | metal response element binding transcription factor 1                                                             | 3             |



| CLUSTER 1 (continued)        |                                                                                                                    |               |
|------------------------------|--------------------------------------------------------------------------------------------------------------------|---------------|
| AFFYMETRIX_3P<br>RIME_IVT_ID | Name                                                                                                               | Peak<br>phase |
| 1456702_x_at                 | methionine adenosyltransferase II, alpha                                                                           | 7             |
| 1438976_x_at                 | methionine adenosyltransferase II, alpha                                                                           | 7             |
| 1438630_x_at                 | methionine adenosyltransferase II, alpha                                                                           | 7             |
| 1438386_x_at                 | methionine adenosyltransferase II, alpha                                                                           | 7             |
| 1433576_at                   | methionine adenosyltransferase II, alpha                                                                           | 7             |
| 1424219_at                   | mitochondrial rRNA methyltransferase 1 homolog (S. cerevisiae)                                                     | 3             |
| 1416991_at                   | mitochondrial translation optimization 1 homolog (S. cerevisiae)                                                   | 7             |
| 1438025_at                   | mitochondrial translational release factor 1-like                                                                  | 7             |
| 1424483_at                   | MOB1, Mps One Binder kinase activator-like 1B (yeast)                                                              | 3             |
| 1434388_at                   | MOB1, Mps One Binder kinase activator-like 2A (yeast)                                                              | 3             |
| 1453032_at                   | MOB1, Mps One Binder kinase activator-like 3 (yeast)                                                               | 3             |
| 1450432_s_at                 | MUS81 endonuclease homolog (yeast)                                                                                 | 7             |
| 1451042_a_at                 | myc induced nuclear antigen                                                                                        | 3             |
| 1433513_x_at                 | NADH dehydrogenase (ubiquinone) 1 alpha subcomplex, 12                                                             | 7             |
| 1435737_a_at                 | nuclear distribution gene E homolog 1 (A nidulans)                                                                 | 11            |
| 1458299_s_at                 | nuclear factor of kappa light polypeptide gene enhancer in B-cells inhibitor, epsilon                              | 3             |
| 1428583_at                   | nuclear fragile X mental retardation protein interacting protein 2                                                 | 3             |
| 1451678_at                   | nuclear prelamin A recognition factor                                                                              | 3             |
| 1419266_at                   | nuclear transcription factor-Y beta                                                                                | 7             |
| 1441733_s_at                 | nucleoporin 153                                                                                                    | 3             |
| 1429627_at                   | peptidylprolyl isomerase (cyclophilin)-like 3                                                                      | 3             |
| 1428997_at                   | PHD finger protein 23                                                                                              | 3             |
| 1451298_at                   | pleckstrin homology domain containing, family H (with MyTH4 domain) member 3                                       | 3             |
| 1434139_at                   | poly (ADP-ribose) polymerase family, member 11                                                                     | 7             |
| 1448277_at                   | polymerase (DNA directed), delta 2, regulatory subunit                                                             | 3             |
| 1435057_x_at                 | polymerase (RNA) I polypeptide E                                                                                   | 3             |
| 1435339_at                   | potassium channel tetramerisation domain containing 15                                                             | 3             |
| 1452625_at                   | potassium channel tetramerisation domain containing 2                                                              | 23            |
| 1416698_a_at                 | predicted gene 10124; predicted gene 6340; CDC28 protein kinase 1b                                                 | 7             |
| 1423040_at                   | predicted gene 11652; predicted gene 5191; basic leucine zipper and W2 domains 1                                   | 3             |
| 1427965_at                   | predicted gene 12115; single-stranded DNA binding protein 1                                                        | 7             |
| 1423723_s_at                 | predicted gene 13886; TAR DNA binding protein                                                                      | 3             |
| 1455183_at                   | predicted gene 3555; predicted gene 7451; serine/threonine kinase 38 like                                          | 7             |
| 1435878_at                   | predicted gene 3555; predicted gene 7451; serine/threonine kinase 38 like                                          | 3             |
| 1416175_a_at                 | predicted gene 7591; voltage-dependent anion channel 3                                                             | 3             |
| 1428458_at                   | processing of precursor 1, ribonuclease P/MRP family, (S. cerevisiae)                                              | 23            |
| 1417591_at                   | prostaglandin E synthase 2                                                                                         | 3             |
| 1454236_a_at                 | protein phosphatase 4, regulatory subunit 1-like; family with sequence similarity 118, member B                    | 3             |
| 1423083_at                   | RAB33B, member of RAS oncogene family                                                                              | 3             |
| 1429491_s_at                 | Rap1 interacting factor 1 homolog (yeast)                                                                          | 7             |
| 1428710_at                   | Ras-like without CAAX 1                                                                                            | 3             |
| 1417400_at                   | retinoic acid induced 14                                                                                           | 3             |
| 1439780_at                   | ribosomal protein L7-like 1; predicted gene 11222                                                                  | 3             |
| 1426386_at                   | ribosomal protein L7-like 1; predicted gene 11222                                                                  | 3             |
| 1455174_at                   | ribosomal protein S19 binding protein 1                                                                            | 23            |
| 1428411_at                   | RIKEN cDNA 1700020114 gene                                                                                         | 3             |
| 1430036_at                   | RIKEN cDNA 2310015B20 gene                                                                                         | 7             |
| 1440992_at                   | RIKEN cDNA 3110052M02 gene                                                                                         | 7             |
| 1438038_at                   | RIKEN cDNA 4930402H24 gene                                                                                         | 7             |
| 1448251_at                   | RIKEN cDNA 9030425E11 gene                                                                                         | 7             |
| 1456331_at                   | RIKEN cDNA 9130023H24 gene                                                                                         | 7             |
| 1439038_at                   | RIKEN cDNA 9130227C08Rik gene                                                                                      | 7             |
| 1444450_at                   | RIKEN cDNA 9530096D07 gene                                                                                         | 23            |
| 1424135_at                   | ring finger and SPRY domain containing 1                                                                           | 23            |
| 1423729_a_at                 | ring finger protein 181                                                                                            | 3             |
| 1436979_x_at                 | RNA binding motif protein 14                                                                                       | 3             |
| 1451321_a_at                 | RNA binding motif protein 43                                                                                       | 3             |
| 1424559_at                   | RNA polymerase II associated protein 2                                                                             | 7             |
| 1434131_at                   | RUN and FYVE domain containing 1                                                                                   | 3             |
| 1429554_at                   | serologically defined colon cancer antigen 3                                                                       | 3             |
| 1455286_at                   | similar to BTB (POZ) domain containing 1 (predicted); BTB (POZ) domain containing 1; predicted gene 14121          | 7             |
| 1455643_s_at                 | similar to CG7338-PA; TSR1, 20S rRNA accumulation, homolog (yeast)                                                 | 3             |
| 1433502_s_at                 | similar to CG7338-PA; TSR1, 20S rRNA accumulation, homolog (yeast)                                                 | 3             |
| 1426765_at                   | similar to COMM domain-containing protein 7; COMM domain containing 7; similar to COMM domain containing protein 7 | 23            |
| 1423502_at                   | similar to mKIAA4005 protein; bromodomain containing 2                                                             | 7             |
| 1434481_at                   | similar to RIKEN cDNA 4121402D02 gene; male-specific lethal 1 homolog (Drosophila)                                 | 23            |
| 1451669_at                   | similar to serine/threonine phosphatase; protein phosphatase 1B, magnesium dependent, beta isoform                 | 3             |
| 1438423_at                   | single-stranded DNA binding protein 2; predicted gene 12470                                                        | 7             |
| 1439399_a_at                 | small nucleolar RNA host gene (non-protein coding) 1                                                               | 7             |

| CLUSTER 1 (continued)        |                                                                                                                                                      |               |
|------------------------------|------------------------------------------------------------------------------------------------------------------------------------------------------|---------------|
| AFFYMETRIX_3P<br>RIME_IVT_ID | Name                                                                                                                                                 | Peak<br>phase |
| 1450900_at                   | SMEK homolog 2, suppressor of mek1 (Dictyostelium)                                                                                                   | 3             |
| 1448385_at                   | solute carrier family 15, member 4                                                                                                                   | 7             |
| 1440569_at                   | solute carrier family 16 (monocarboxylic acid transporters), member 10                                                                               | 7             |
| 1452717_at                   | solute carrier family 25 (mitochondrial carrier, phosphate carrier), member 24                                                                       | 3             |
| 1423796_at                   | splicing factor proline/glutamine rich (polypyrimidine tract binding protein associated); similar to PTB-associated splicing factor                  | 23            |
| 1453722_s_at                 | splicing factor, arginine/serine-rich 1 (ASF/SF2); similar to splicing factor, arginine/serine-rich 1 (splicing factor 2, alternate splicing factor) | 3             |
| 1434972_x_at                 | splicing factor, arginine/serine-rich 1 (ASF/SF2); similar to splicing factor, arginine/serine-rich 1 (splicing factor 2, alternate splicing factor) | 3             |
| 1428100_at                   | splicing factor, arginine/serine-rich 1 (ASF/SF2); similar to splicing factor, arginine/serine-rich 1 (splicing factor 2, alternate splicing factor) | 23            |
| 1424883_s_at                 | splicing factor, arginine/serine-rich 7                                                                                                              | 23            |
| 1455695_at                   | ST8 alpha-N-acetyl-neuraminide alpha-2,8-sialyltransferase 1                                                                                         | 7             |
| 1426771_at                   | taurine upregulated gene 1                                                                                                                           | 3             |
| 1455336_at                   | THAP domain containing, apoptosis associated protein 2                                                                                               | 3             |
| 1448994_at                   | trans-acting transcription factor 1                                                                                                                  | 23            |
| 1424610_at                   | TruB pseudouridine (psi) synthase homolog 2 (E. coli)                                                                                                | 7             |
| 1460446_at                   | tryptophan rich basic protein                                                                                                                        | 7             |
| 1424644_at                   | tubulin-specific chaperone C                                                                                                                         | 3             |
| 1448147_at                   | tumor necrosis factor receptor superfamily, member 19                                                                                                | 3             |
| 1448014_s_at                 | ubiquitin specific peptidase 24                                                                                                                      | 3             |
| 1436635_at                   | ubiquitin-conjugating enzyme E2Z (putative)                                                                                                          | 3             |
| 1435164_s_at                 | ubiquitin-like modifier activating enzyme 3                                                                                                          | 23            |
| 1417202_s_at                 | ubiquitin-like modifier activating enzyme 3                                                                                                          | 7             |
| 1428944_at                   | ubiquitin-like modifier activating enzyme 6                                                                                                          | 3             |
| 1453162_at                   | UTP11-like, U3 small nucleolar ribonucleoprotein, (yeast)                                                                                            | 7             |
| 1424777_at                   | WD repeat domain 21                                                                                                                                  | 7             |
| 1434552_at                   | WD repeat domain 77; predicted gene 15528                                                                                                            | 3             |
| 1422844_a_at                 | WD repeat domain 77; predicted gene 15528                                                                                                            | 23            |
| 1454922_at                   | WD repeat domain 92                                                                                                                                  | 3             |
| 1429125_at                   | zinc finger and BTB domain containing 9                                                                                                              | 7             |
| 1420095_s_at                 | zinc finger and SCAN domain containing 21                                                                                                            | 7             |
| 1452374_at                   | zinc finger protein 322A                                                                                                                             | 23            |
| 1439035_at                   | zinc finger protein 322A                                                                                                                             | 3             |
| 1437959_at                   | zinc finger protein 324                                                                                                                              | 3             |
| 1431830_at                   | zinc finger protein 329                                                                                                                              | 3             |
| 1451997_at                   | zinc finger protein 426                                                                                                                              | 7             |
| 1429800_at                   | zinc finger protein 526                                                                                                                              | 7             |
| 1455633_at                   | zinc finger protein 647                                                                                                                              | 23            |
| 1424261_at                   | zinc finger protein 672                                                                                                                              | 23            |
| 1434461_at                   | zinc finger protein 715                                                                                                                              | 7             |
| 1436594_at                   | zinc finger protein 719                                                                                                                              | 11            |
| 1453230_at                   | zinc finger protein 74; hypothetical protein LOC100044255                                                                                            | 7             |
| 1440226_at                   | zinc finger protein 760; hypothetical protein LOC100044275                                                                                           | 23            |
| 1426293_at                   | zinc finger protein 790                                                                                                                              | 7             |
| 1452319_at                   | zinc finger protein 82                                                                                                                               | 7             |
| 1447947_at                   | zinc finger, FYVE domain containing 16                                                                                                               | 3             |

| CLUSTER 2                    |                                                    |               |
|------------------------------|----------------------------------------------------|---------------|
| AFFYMETRIX_3P<br>RIME_IVT_ID | Name                                               | Peak<br>phase |
| 1428547_at                   | 5' nucleotidase, ecto                              | 19            |
| 1421858_at                   | a disintegrin and metallopeptidase domain 17       | 23            |
| 1424951_at                   | BAI1-associated protein 2-like 1                   | 23            |
| 1429438_at                   | BCL6 interacting corepressor                       | 3             |
| 1434410_at                   | beta-gamma crystallin domain containing 3          | 3             |
| 1437270_a_at                 | cardiotrophin-like cytokine factor 1               | 23            |
| 1417132_at                   | cell division cycle 25 homolog A (S. pombe)        | 23            |
| 1436156_at                   | cell division cycle and apoptosis regulator 1      | 23            |
| 1419583_at                   | chromobox homolog 4 (Drosophila Pc class)          | 23            |
| 1435775_at                   | circadian locomoter output cycles kaput            | 3             |
| 1418659_at                   | circadian locomoter output cycles kaput            | 3             |
| 1451114_at                   | CKLF-like MARVEL transmembrane domain containing 6 | 19            |
| 1423792_a_at                 | CKLF-like MARVEL transmembrane domain containing 6 | 23            |
| 1434953_at                   | coiled-coil domain containing 93                   | 23            |
| 1416814_at                   | cytotoxic granule-associated RNA binding protein 1 | 23            |
| 1426915_at                   | death associated protein kinase 1                  | 23            |
| 1455711_at                   | deltex 4 homolog (Drosophila)                      | 3             |
| 1460174_at                   | dexamethasone-induced transcript                   | 23            |

| CLUSTER 2 (continued)        |                                                                                                                                                                                                                                                            |               |
|------------------------------|------------------------------------------------------------------------------------------------------------------------------------------------------------------------------------------------------------------------------------------------------------|---------------|
| AFFYMETRIX_3P<br>RIME_IVT_ID | Name                                                                                                                                                                                                                                                       | Peak<br>phase |
| 1452908_at                   | DIP2 disco-interacting protein 2 homolog A (Drosophila); similar to mKIAA0184 protein                                                                                                                                                                      | 3             |
| 1436125_at                   | DNA segment, Chr 16, ERATO Doi 472, expressed                                                                                                                                                                                                              | 23            |
| 1455118_at                   | DNA segment, Chr 9, ERATO Doi 402, expressed                                                                                                                                                                                                               | 3             |
| 1416755_at                   | DnaJ (Hsp40) homolog, subfamily B, member 1                                                                                                                                                                                                                | 3             |
| 1418648_at                   | EGL nine homolog 3 (C. elegans)                                                                                                                                                                                                                            | 3             |
| 1435143_at                   | ELK3, member of ETS oncogene family                                                                                                                                                                                                                        | 3             |
| 1451550_at                   | Eph receptor B3                                                                                                                                                                                                                                            | 23            |
| 1448510_at                   | ephrin A1                                                                                                                                                                                                                                                  | 23            |
| 1416895_at                   | ephrin A1                                                                                                                                                                                                                                                  | 23            |
| 1434105_at                   | EPM2A (Iaforin) interacting protein 1                                                                                                                                                                                                                      | 23            |
| 1433489_s_at                 | fibroblast growth factor receptor 2                                                                                                                                                                                                                        | 3             |
| 1434344_at                   | G patch domain and KOW motifs                                                                                                                                                                                                                              | 3             |
| 1443997_at                   | G protein regulated inducer of neurite outgrowth 2                                                                                                                                                                                                         | 23            |
| 1449514_at                   | G protein-coupled receptor kinase 5                                                                                                                                                                                                                        | 3             |
| 1436672_at                   | G protein-coupled receptor kinase 5                                                                                                                                                                                                                        | 3             |
| 1424895_at                   | G-protein signalling modulator 2 (AGS3-like, C. elegans)                                                                                                                                                                                                   | 23            |
| 1435606_at                   | galactose-3-O-sulfotransferase 4                                                                                                                                                                                                                           | 23            |
| 1434568_at                   | general transcription factor IIIC, polypeptide 6, alpha                                                                                                                                                                                                    | 3             |
| 1428715_at                   | glutamine fructose-6-phosphate transaminase 1                                                                                                                                                                                                              | 23            |
| 1436256_at                   | GrpE-like 2, mitochondrial                                                                                                                                                                                                                                 | 23            |
| 1435932_at                   | Hermansky-Pudlak syndrome 6                                                                                                                                                                                                                                | 3             |
| 1427144_at                   | heterogeneous nuclear ribonucleoprotein L-like; glutathione peroxidase 4                                                                                                                                                                                   | 23            |
| 1455631_at                   | histocompatibility 13                                                                                                                                                                                                                                      | 23            |
| 1448704_s_at                 | histocompatibility 47                                                                                                                                                                                                                                      | 7             |
| 1425874_at                   | homeo box C13                                                                                                                                                                                                                                              | 23            |
| 1418678_at                   | hyaluronan synthase 2                                                                                                                                                                                                                                      | 3             |
| 1417981_at                   | insulin induced gene 2                                                                                                                                                                                                                                     | 23            |
| 1417980_a_at                 | insulin induced gene 2                                                                                                                                                                                                                                     | 23            |
| 1437672_at                   | insulin receptor substrate 3                                                                                                                                                                                                                               | 23            |
| 1423275_at                   | integrator complex subunit 6                                                                                                                                                                                                                               | 7             |
| 1423274_at                   | integrator complex subunit 6                                                                                                                                                                                                                               | 3             |
| 1442350_at                   | integrin alpha 2; far 3' UTR (from AK028540)                                                                                                                                                                                                               | 23            |
| 1440169_x_at                 | interferon (alpha and beta) receptor 2                                                                                                                                                                                                                     | 23            |
| 1424885_at                   | kelch domain containing 8A                                                                                                                                                                                                                                 | 23            |
| 1454637_at                   | kelch-like 8 (Drosophila)                                                                                                                                                                                                                                  | 23            |
| 1435472_at                   | kringle containing transmembrane protein 1                                                                                                                                                                                                                 | 3             |
| 1427512_a_at                 | laminin, alpha 3                                                                                                                                                                                                                                           | 19            |
| 1435832_at                   | leucine rich repeat containing 4                                                                                                                                                                                                                           | 3             |
| 1416097_at                   | leucine rich repeat containing 4                                                                                                                                                                                                                           | 3             |
| 1454847_at                   | lipoma HMGIC fusion partner-like 2                                                                                                                                                                                                                         | 7             |
| 1416914_s_at                 | mammary tumor virus receptor 2                                                                                                                                                                                                                             | 3             |
| 1448383_at                   | matrix metalloproteinase 14 (membrane-inserted)                                                                                                                                                                                                            | 3             |
| 1457708_at                   | methyl-CpG binding domain protein 4                                                                                                                                                                                                                        | 23            |
| 1449490_at                   | methyl-CpG binding domain protein 4                                                                                                                                                                                                                        | 23            |
| 1441079_at                   | methyl-CpG binding domain protein 4                                                                                                                                                                                                                        | 23            |
| 1437152_at                   | mex3 homolog B (C. elegans)                                                                                                                                                                                                                                | 23            |
| 1437627_at                   | mex3 homolog D (C. elegans)                                                                                                                                                                                                                                | 3             |
| 1454919_at                   | N-myristoyltransferase 2                                                                                                                                                                                                                                   | 23            |
| 1436189_at                   | NAD(P)H dehydrogenase, quinone 2                                                                                                                                                                                                                           | 23            |
| 1421037_at                   | neuronal PAS domain protein 2                                                                                                                                                                                                                              | 23            |
| 1434802_s_at                 | neurotrophin 3                                                                                                                                                                                                                                             | 23            |
| 1415926_at                   | nucleoporin 62                                                                                                                                                                                                                                             | 19            |
| 1417971_at                   | nurim (nuclear envelope membrane protein)                                                                                                                                                                                                                  | 23            |
| 1455131_at                   | optic atrophy 3 (human)                                                                                                                                                                                                                                    | 23            |
| 1428484_at                   | oxysterol binding protein-like 3                                                                                                                                                                                                                           | 23            |
| 1420851_at                   | par-6 partitioning defective 6 homolog gamma (C. elegans)                                                                                                                                                                                                  | 3             |
| 1416069_at                   | phosphofructokinase, platelet                                                                                                                                                                                                                              | 3             |
| 1435363_at                   | pleckstrin homology domain containing, family G (with RhoGef domain) member 1                                                                                                                                                                              | 23            |
| 1455037_at                   | plexin A2                                                                                                                                                                                                                                                  | 3             |
| 1451753_at                   | plexin A2                                                                                                                                                                                                                                                  | 23            |
| 1451475_at                   | plexin D1                                                                                                                                                                                                                                                  | 23            |
| 1438455_at                   | poly(A) binding protein, cytoplasmic 4-like                                                                                                                                                                                                                | 23            |
| 1427094_at                   | polymerase (DNA directed), epsilon 2 (p59 subunit)                                                                                                                                                                                                         | 3             |
| 1430125_s_at                 | PQ loop repeat containing 1                                                                                                                                                                                                                                | 23            |
| 1426567_a_at                 | PQ loop repeat containing 1                                                                                                                                                                                                                                | 23            |
| 1459861_s_at                 | predicted gene 12397                                                                                                                                                                                                                                       | 23            |
| 1423911_at                   | predicted gene 3353; predicted gene 13142; predicted gene 13169; similar to protein phosphatase 2, regulatory subunit B (B56), alpha isoform; predicted gene 13244; predicted gene 13233; protein phosphatase 2, regulatory subunit B (B56), alpha isoform | 3             |
| 1456846_at                   | predicted gene 5188                                                                                                                                                                                                                                        | 3             |

| CLUSTER 2 (continued)        |                                                                                                                                                                                                                    |               |
|------------------------------|--------------------------------------------------------------------------------------------------------------------------------------------------------------------------------------------------------------------|---------------|
| AFFYMETRIX_3P<br>RIME_IVT_ID | Name                                                                                                                                                                                                               | Peak<br>phase |
| 1423304_a_at                 | predicted gene 6162; similar to ring finger 111; ring finger 111                                                                                                                                                   | 3             |
| 1448020_at                   | predicted gene 9392; similar to Raichu404X; RAS-related protein-1a                                                                                                                                                 | 23            |
| 1436993_x_at                 | profilin 2                                                                                                                                                                                                         | 3             |
| 1452834_at                   | proline rich 5 like; hypothetical protein LOC100048398                                                                                                                                                             | 3             |
| 1455394_at                   | protein inhibitor of activated STAT 4                                                                                                                                                                              | 23            |
| 1426726_at                   | protein phosphatase 1, regulatory subunit 10                                                                                                                                                                       | 23            |
| 1417479_at                   | protein phosphatase 2, regulatory subunit B", gamma; predicted gene 2446; predicted gene 2436                                                                                                                      | 3             |
| 1432435_s_at                 | protein phosphatase 4, regulatory subunit 1-like; family with sequence similarity 118, member B                                                                                                                    | 23            |
| 1422541_at                   | protein tyrosine phosphatase, receptor type, M                                                                                                                                                                     | 3             |
| 1416389_a_at                 | regulator of chromosome condensation (RCC1) and BTB (POZ) domain containing protein 2                                                                                                                              | 3             |
| 1416962_at                   | regulator of chromosome condensation 1                                                                                                                                                                             | 3             |
| 1450896_at                   | Rho GTPase activating protein 5                                                                                                                                                                                    | 23            |
| 1434422_at                   | RIKEN cDNA 1700066M21 gene                                                                                                                                                                                         | 23            |
| 1428337_at                   | RIKEN cDNA 1810034K20 gene                                                                                                                                                                                         | 3             |
| 1429061_at                   | RIKEN cDNA 1810063B05 gene                                                                                                                                                                                         | 23            |
| 1438972_x_at                 | RIKEN cDNA 2810410L24 gene                                                                                                                                                                                         | 19            |
| 1424802_a_at                 | RIKEN cDNA 3300001P08 gene                                                                                                                                                                                         | 3             |
| 1433174_a_at                 | RIKEN cDNA 5430440L12 gene                                                                                                                                                                                         | 23            |
| 1435928_at                   | RIKEN cDNA 6430548M08 gene                                                                                                                                                                                         | 3             |
| 1448250_at                   | RIKEN cDNA 9030425E11 gene                                                                                                                                                                                         | 3             |
| 1429987_at                   | RIKEN cDNA 9930013L23 gene                                                                                                                                                                                         | 23            |
| 1424134_at                   | ring finger and SPRY domain containing 1                                                                                                                                                                           | 3             |
| 1455412_at                   | Scm-like with four mbt domains 1                                                                                                                                                                                   | 3             |
| 1420824_at                   | sema domain, immunoglobulin domain (Ig), transmembrane domain (TM) and short cytoplasmic domain, (semaphorin) 4D                                                                                                   | 23            |
| 1426248_at                   | serine/threonine kinase 24 (STE20 homolog, yeast)                                                                                                                                                                  | 23            |
| 1421077_at                   | SERTA domain containing 3                                                                                                                                                                                          | 23            |
| 1449303_at                   | sestrin 3                                                                                                                                                                                                          | 23            |
| 1423941_at                   | similar to Calcium/calmodulin-dependent protein kinase type II gamma chain (CaM-kinase II gamma chain) (CaM kinase II gamma subunit) (CaMK-II subunit gamma); calcium/calmodulin-dependent protein kinase II gamma | 23            |
| 1450020_at                   | similar to chemokine receptor CX3CR1; chemokine (C-X3-C) receptor 1                                                                                                                                                | 3             |
| 1456264_at                   | similar to COMM domain-containing protein 7; COMM domain containing 7; similar to COMM domain containing protein 7                                                                                                 | 3             |
| 1455106_a_at                 | similar to creatine kinase, brain; predicted gene 12892; creatine kinase, brain                                                                                                                                    | 3             |
| 1434790_a_at                 | similar to Lta4h protein                                                                                                                                                                                           | 23            |
| 1455703_at                   | similar to RAC-beta serine/threonine-protein kinase (RAC-PK-beta) (Protein kinase Akt-2) (Protein kinase B, beta) (PKB beta); thymoma viral proto-oncogene 2; similar to serine/threonine kinase                   | 23            |
| 1429475_at                   | similar to RIKEN cDNA 2810457I06                                                                                                                                                                                   | 23            |
| 1428872_at                   | similar to RIKEN cDNA 4121402D02 gene; male-specific lethal 1 homolog (Drosophila)                                                                                                                                 | 23            |
| 1428871_at                   | similar to RIKEN cDNA 4121402D02 gene; male-specific lethal 1 homolog (Drosophila)                                                                                                                                 | 3             |
| 1419360_a_at                 | similar to Ss18 protein; synovial sarcoma translocation, Chromosome 18                                                                                                                                             | 23            |
| 1418673_at                   | snail homolog 2 (Drosophila)                                                                                                                                                                                       | 23            |
| 1421225_a_at                 | solute carrier family 4 (anion exchanger), member 4                                                                                                                                                                | 3             |
| 1433645_at                   | solute carrier family 44, member 1                                                                                                                                                                                 | 23            |
| 1428176_at                   | sphingosine-1-phosphate receptor 2                                                                                                                                                                                 | 3             |
| 1417891_at                   | splA/ryanodine receptor domain and SOCS box containing 3                                                                                                                                                           | 23            |
| 1438458_a_at                 | splicing factor proline/glutamine rich (polypyrimidine tract binding protein associated); similar to PTB-associated splicing factor                                                                                | 3             |
| 1423795_at                   | splicing factor proline/glutamine rich (polypyrimidine tract binding protein associated); similar to PTB-associated splicing factor                                                                                | 3             |
| 1457265_at                   | splicing factor, arginine/serine-rich 17b                                                                                                                                                                          | 23            |
| 1458175_at                   | spondin 2, extracellular matrix protein                                                                                                                                                                            | 3             |
| 1417860_a_at                 | spondin 2, extracellular matrix protein                                                                                                                                                                            | 3             |
| 1433575_at                   | SRY-box containing gene 19; SRY-box containing gene 4                                                                                                                                                              | 23            |
| 1418546_a_at                 | STAM binding protein like 1                                                                                                                                                                                        | 19            |
| 1452276_at                   | SWI/SNF-related, matrix-associated actin-dependent regulator of chromatin, subfamily a, containing DEAD/H box 1                                                                                                    | 3             |
| 1433909_at                   | synaptotagmin XVII                                                                                                                                                                                                 | 3             |
| 1445667_at                   | TBC1 domain family, member 10a                                                                                                                                                                                     | 3             |
| 1450662_at                   | testis specific protein kinase 1                                                                                                                                                                                   | 3             |
| 1424568_at                   | tetraspanin 2                                                                                                                                                                                                      | 19            |
| 1424567_at                   | tetraspanin 2                                                                                                                                                                                                      | 3             |
| 1443952_at                   | thyroid hormone receptor alpha; similar to thyroid hormone receptor                                                                                                                                                | 3             |
| 1426997_at                   | thyroid hormone receptor alpha; similar to thyroid hormone receptor                                                                                                                                                | 23            |
| 1457676_at                   | toll-interleukin 1 receptor (TIR) domain-containing adaptor protein                                                                                                                                                | 3             |
| 1436460_at                   | transmembrane protein 194                                                                                                                                                                                          | 3             |
| 1437910_at                   | transmembrane protein 39b                                                                                                                                                                                          | 23            |
| 1448551_a_at                 | tripartite motif-containing 2                                                                                                                                                                                      | 23            |
| 1417028_a_at                 | tripartite motif-containing 2                                                                                                                                                                                      | 23            |
| 1417027_at                   | tripartite motif-containing 2                                                                                                                                                                                      | 23            |

| CLUSTER 2 (continued)        |                                                                          |               |
|------------------------------|--------------------------------------------------------------------------|---------------|
| AFFYMETRIX_3P<br>RIME_IVT_ID | Name                                                                     | Peak<br>phase |
| 1448101_s_at                 | tripartite motif-containing 27                                           | 3             |
| 1438376_s_at                 | tripartite motif-containing 27                                           | 3             |
| 1451663_a_at                 | tripartite motif-containing 3                                            | 3             |
| 1439440_x_at                 | twinfilin, actin-binding protein, homolog 2 (Drosophila)                 | 23            |
| 1418733_at                   | twist homolog 1 (Drosophila)                                             | 23            |
| 1436805_at                   | ubiquitin associated and SH3 domain containing, B                        | 23            |
| 1439302_at                   | ubiquitin-like modifier activating enzyme 6                              | 3             |
| 1460688_s_at                 | unc-119 homolog B (C. elegans)                                           | 23            |
| 1427933_at                   | vacuolar protein sorting 33B (yeast)                                     | 23            |
| 1452898_at                   | vacuolar protein sorting 36 (yeast)                                      | 7             |
| 1434708_at                   | von Hippel-Lindau syndrome                                               | 3             |
| 1451649_a_at                 | WD repeat domain 75                                                      | 3             |
| 1428616_at                   | zinc finger protein 131; similar to putative transcription factor ZNF131 | 19            |
| 1420944_at                   | zinc finger protein 185                                                  | 3             |
| 1420943_at                   | zinc finger protein 185                                                  | 3             |
| 1434689_at                   | zinc finger protein 637                                                  | 3             |
| 1433748_at                   | zinc finger, DHHC domain containing 18                                   | 23            |
| 1428052_a_at                 | zinc finger, MYM domain containing 1                                     | 3             |
| 1452970_at                   | zinc finger, MYM-type 2                                                  | 23            |

| CLUSTER 3                    |                                                                                              |               |
|------------------------------|----------------------------------------------------------------------------------------------|---------------|
| AFFYMETRIX_3P<br>RIME_IVT_ID | Name                                                                                         | Peak<br>phase |
| 1428821_at                   | 1-acylglycerol-3-phosphate O-acyltransferase 2 (lysophosphatidic acid acyltransferase, beta) | 7             |
| 1448318_at                   | adipose differentiation related protein                                                      | 7             |
| 1450706_a_at                 | ADP-ribosylation factor-like 3                                                               | 7             |
| 1457021_x_at                 | anti-Mullerian hormone type 2 receptor                                                       | 7             |
| 1439021_at                   | ArfGAP with coiled-coil, ankyrin repeat and PH domains 3                                     | 3             |
| 1423122_at                   | arginine vasopressin-induced 1                                                               | 7             |
| 1434543_a_at                 | bolA-like 2 (E. coli)                                                                        | 7             |
| 1416257_at                   | calpain 2                                                                                    | 7             |
| 1452901_at                   | cAMP responsive element binding protein 1                                                    | 7             |
| 1448347_a_at                 | cell cycle associated protein 1                                                              | 7             |
| 1436034_at                   | centrosomal protein 68                                                                       | 7             |
| 1422636_at                   | cyclin D binding myb-like transcription factor 1                                             | 7             |
| 1434435_s_at                 | cytochrome c oxidase, subunit XVII assembly protein homolog (yeast)                          | 7             |
| 1450654_a_at                 | dehydrodolichyl diphosphate synthase                                                         | 7             |
| 1420368_at                   | density-regulated protein                                                                    | 3             |
| 1420129_s_at                 | DNA segment, Chr 10, Wayne State University 52, expressed                                    | 7             |
| 1448900_at                   | DNA segment, Chr 16, human D22S680E, expressed                                               | 7             |
| 1435117_a_at                 | DnaJ (Hsp40) homolog, subfamily C, member 27                                                 | 3             |
| 1452594_at                   | dual specificity phosphatase 11 (RNA/RNP complex 1-interacting)                              | 7             |
| 1452153_at                   | F-box protein 18                                                                             | 7             |
| 1447904_s_at                 | farnesyltransferase, CAAX box, alpha; similar to farnesyltransferase alpha subunit           | 7             |
| 1426369_at                   | fatty acyl CoA reductase 1                                                                   | 3             |
| 1435315_s_at                 | fatty acyl CoA reductase 1                                                                   | 11            |
| 1438702_at                   | fibronectin leucine rich transmembrane protein 2                                             | 7             |
| 1416859_at                   | FK506 binding protein 3                                                                      | 11            |
| 1417113_at                   | germ cell-less homolog 1 (Drosophila)                                                        | 7             |
| 1448649_at                   | glutamyl aminopeptidase                                                                      | 7             |
| 1451467_s_at                 | GTP binding protein 5                                                                        | 7             |
| 1438180_x_at                 | HCLS1 associated X-1; silica-induced gene 111                                                | 7             |
| 1435194_at                   | heat shock protein 4                                                                         | 11            |
| 1415872_at                   | heterogeneous nuclear ribonucleoprotein H1                                                   | 7             |
| 1423050_s_at                 | heterogeneous nuclear ribonucleoprotein U                                                    | 7             |
| 1434551_at                   | heterogeneous nuclear ribonucleoprotein U-like 2                                             | 7             |
| 1424017_a_at                 | histidine triad nucleotide binding protein 1                                                 | 7             |
| 1417024_at                   | histidyl-tRNA synthetase                                                                     | 7             |
| 1436172_at                   | hypothetical protein 9530028C05                                                              | 7             |
| 1418116_at                   | interferon alpha responsive gene                                                             | 7             |
| 1424746_at                   | kinesin family member 1C                                                                     | 7             |
| 1425991_a_at                 | KN motif and ankyrin repeat domains 2                                                        | 3             |
| 1425141_at                   | lactamase, beta 2                                                                            | 7             |
| 1429071_at                   | malic enzyme 3, NADP(+)-dependent, mitochondrial                                             | 7             |
| 1416424_at                   | mannose-6-phosphate receptor binding protein 1                                               | 7             |
| 1417234_at                   | matrix metalloproteinase 11                                                                  | 7             |
| 1416759_at                   | microtubule associated monooxygenase, calponin and LIM domain containing 1                   | 7             |
| 1448190_at                   | mitochondrial ribosomal protein L33                                                          | 7             |
| 1460701_a_at                 | mitochondrial ribosomal protein L52                                                          | 7             |
| 1434815_a_at                 | mitogen-activated protein kinase-activated protein kinase 3                                  | 7             |

| CLUSTER 3 (continued)        |                                                                                                                                                                                                                                                                                                                                                                                                                                                                                                                                                                                                                                             |               |
|------------------------------|---------------------------------------------------------------------------------------------------------------------------------------------------------------------------------------------------------------------------------------------------------------------------------------------------------------------------------------------------------------------------------------------------------------------------------------------------------------------------------------------------------------------------------------------------------------------------------------------------------------------------------------------|---------------|
| AFFYMETRIX_3P<br>RIME_IVT_ID | Name                                                                                                                                                                                                                                                                                                                                                                                                                                                                                                                                                                                                                                        | Peak<br>phase |
| 1448979_at                   | muted                                                                                                                                                                                                                                                                                                                                                                                                                                                                                                                                                                                                                                       | 7             |
| 1426052_at                   | mutL homolog 3 (E coli)                                                                                                                                                                                                                                                                                                                                                                                                                                                                                                                                                                                                                     | 7             |
| 1459991_at                   | myosin IXa                                                                                                                                                                                                                                                                                                                                                                                                                                                                                                                                                                                                                                  | 7             |
| 1426464_at                   | nuclear receptor subfamily 1, group D, member 1                                                                                                                                                                                                                                                                                                                                                                                                                                                                                                                                                                                             | 7             |
| 1448476_at                   | nucleosome assembly protein 1-like 4                                                                                                                                                                                                                                                                                                                                                                                                                                                                                                                                                                                                        | 7             |
| 1431302_a_at                 | nudix (nucleoside diphosphate linked moiety X)-type motif 7                                                                                                                                                                                                                                                                                                                                                                                                                                                                                                                                                                                 | 3             |
| 1428309_s_at                 | p53 and DNA damage regulated 1                                                                                                                                                                                                                                                                                                                                                                                                                                                                                                                                                                                                              | 3             |
| 1448432_at                   | phospholipase C, delta 1                                                                                                                                                                                                                                                                                                                                                                                                                                                                                                                                                                                                                    | 7             |
| 1417138_s_at                 | polymerase (RNA) II (DNA directed) polypeptide E                                                                                                                                                                                                                                                                                                                                                                                                                                                                                                                                                                                            | 11            |
| 1434383_at                   | praja 2, RING-H2 motif containing                                                                                                                                                                                                                                                                                                                                                                                                                                                                                                                                                                                                           | 7             |
| 1452083_a_at                 | praja1, RING-H2 motif containing                                                                                                                                                                                                                                                                                                                                                                                                                                                                                                                                                                                                            | 3             |
| 1438940_x_at                 | predicted gene 11663; predicted gene 2992; predicted gene 7862; high mobility group nucleosomal binding domain 1; similar to high mobility group nucleosomal binding domain 1                                                                                                                                                                                                                                                                                                                                                                                                                                                               | 7             |
| 1427174_at                   | predicted gene 2004                                                                                                                                                                                                                                                                                                                                                                                                                                                                                                                                                                                                                         | 7             |
| 1444589_at                   | predicted gene 4944                                                                                                                                                                                                                                                                                                                                                                                                                                                                                                                                                                                                                         | 7             |
| 1439438_a_at                 | predicted gene 6563; SAP domain containing ribonucleoprotein                                                                                                                                                                                                                                                                                                                                                                                                                                                                                                                                                                                | 7             |
| 1417998_at                   | predicted gene 9769; prostaglandin E synthase 3 (cytosolic); similar to Sid3177p; predicted gene 11893                                                                                                                                                                                                                                                                                                                                                                                                                                                                                                                                      | 7             |
| 1436846_x_at                 | predicted gene, EG546165; predicted gene 2423; hypothetical protein LOC674211; tyrosine 3-monooxygenase/tryptophan 5-monooxygenase activation protein, theta polypeptide                                                                                                                                                                                                                                                                                                                                                                                                                                                                    | 7             |
| 1460590_s_at                 | predicted gene, EG546165; predicted gene 2423; hypothetical protein LOC674211; tyrosine 3-monooxygenase/tryptophan 5-monooxygenase activation protein, theta polypeptide                                                                                                                                                                                                                                                                                                                                                                                                                                                                    | 7             |
| 1460621_x_at                 | predicted gene, EG546165; predicted gene 2423; hypothetical protein LOC674211; tyrosine 3-monooxygenase/tryptophan 5-monooxygenase activation protein, theta polypeptide                                                                                                                                                                                                                                                                                                                                                                                                                                                                    | 7             |
| 1448528_at                   | programmed cell death 10                                                                                                                                                                                                                                                                                                                                                                                                                                                                                                                                                                                                                    | 7             |
| 1418840_at                   | programmed cell death 4                                                                                                                                                                                                                                                                                                                                                                                                                                                                                                                                                                                                                     | 7             |
| 1460198_a_at                 | proteasome (prosome, macropain) subunit, beta type 3                                                                                                                                                                                                                                                                                                                                                                                                                                                                                                                                                                                        | 7             |
| 1437234_x_at                 | protein arginine N-methyltransferase 2                                                                                                                                                                                                                                                                                                                                                                                                                                                                                                                                                                                                      | 7             |
| 1416400_at                   | pyrroline-5-carboxylate reductase-like                                                                                                                                                                                                                                                                                                                                                                                                                                                                                                                                                                                                      | 7             |
| 1418924_at                   | Ras association (RalGDS/AF-6) domain family (N-terminal) member 7                                                                                                                                                                                                                                                                                                                                                                                                                                                                                                                                                                           | 7             |
| 1460543_x_at                 | ribosomal protein L37a; predicted gene 4149; predicted gene 4613; predicted gene 14251; predicted gene 14173                                                                                                                                                                                                                                                                                                                                                                                                                                                                                                                                | 7             |
| 1435546_a_at                 | RIKEN cDNA 1810013L24 gene                                                                                                                                                                                                                                                                                                                                                                                                                                                                                                                                                                                                                  | 7             |
| 1452043_at                   | RIKEN cDNA 2310011J03 gene                                                                                                                                                                                                                                                                                                                                                                                                                                                                                                                                                                                                                  | 7             |
| 1428083_at                   | RIKEN cDNA 2310043N10 gene                                                                                                                                                                                                                                                                                                                                                                                                                                                                                                                                                                                                                  | 7             |
| 1416577_a_at                 | ring-box 1; predicted gene 9840                                                                                                                                                                                                                                                                                                                                                                                                                                                                                                                                                                                                             | 7             |
| 1454815_at                   | SERTA domain containing 2                                                                                                                                                                                                                                                                                                                                                                                                                                                                                                                                                                                                                   | 11            |
| 1448316_at                   | similar to CKLF-like MARVEL transmembrane domain containing 3                                                                                                                                                                                                                                                                                                                                                                                                                                                                                                                                                                               | 11            |
| 1456125_a_at                 | similar to cytoplasmic dynein light chain 1; predicted gene 11582; dynein light chain LC8-type 1; predicted gene 6788                                                                                                                                                                                                                                                                                                                                                                                                                                                                                                                       | 3             |
| 1456898_at                   | similar to hCG45299; purine rich element binding protein A                                                                                                                                                                                                                                                                                                                                                                                                                                                                                                                                                                                  | 7             |
| 1454627_a_at                 | similar to ribosomal protein; predicted gene 6344; predicted gene 11449; predicted gene 13841; predicted gene 8210; hypothetical protein LOC675793; ribosomal protein L29; predicted gene 12704; predicted gene 7252; predicted gene 8965; predicted gene 13213; predicted gene 8580; predicted gene 15526; predicted gene 7934; predicted gene 5218; predicted gene 5561; predicted gene 8548; predicted gene 12447; predicted gene 8852; predicted gene 12508; predicted gene 6010; predicted gene 13921; predicted gene 8860; predicted gene 13545; predicted gene 9405; predicted gene 6862; predicted gene 13141; predicted gene 10709 | 7             |
| 1449815_a_at                 | single-stranded DNA binding protein 2; predicted gene 12470                                                                                                                                                                                                                                                                                                                                                                                                                                                                                                                                                                                 | 11            |
| 1417648_s_at                 | sorting nexin 5                                                                                                                                                                                                                                                                                                                                                                                                                                                                                                                                                                                                                             | 7             |
| 1452439_s_at                 | splicing factor, arginine/serine-rich 2 (SC-35)                                                                                                                                                                                                                                                                                                                                                                                                                                                                                                                                                                                             | 7             |
| 1449079_s_at                 | ST3 beta-galactoside alpha-2,3-sialyltransferase 6                                                                                                                                                                                                                                                                                                                                                                                                                                                                                                                                                                                          | 3             |
| 1423350_at                   | suppressor of cytokine signaling 5                                                                                                                                                                                                                                                                                                                                                                                                                                                                                                                                                                                                          | 7             |
| 1435982_at                   | syntaxin 12                                                                                                                                                                                                                                                                                                                                                                                                                                                                                                                                                                                                                                 | 7             |
| 1418164_at                   | syntaxin 2                                                                                                                                                                                                                                                                                                                                                                                                                                                                                                                                                                                                                                  | 7             |
| 1448028_at                   | TBC1 domain family, member 24                                                                                                                                                                                                                                                                                                                                                                                                                                                                                                                                                                                                               | 7             |
| 1435334_at                   | tetratricopeptide repeat domain 7                                                                                                                                                                                                                                                                                                                                                                                                                                                                                                                                                                                                           | 7             |
| 1424383_at                   | transmembrane protein 51                                                                                                                                                                                                                                                                                                                                                                                                                                                                                                                                                                                                                    | 7             |
| 1454797_at                   | transmembrane protein 55b                                                                                                                                                                                                                                                                                                                                                                                                                                                                                                                                                                                                                   | 3             |
| 1428747_at                   | tRNA selenocysteine 1 associated protein 1                                                                                                                                                                                                                                                                                                                                                                                                                                                                                                                                                                                                  | 7             |
| 1420880_a_at                 | tyrosine 3-monooxygenase/tryptophan 5-monooxygenase activation protein, beta polypeptide                                                                                                                                                                                                                                                                                                                                                                                                                                                                                                                                                    | 7             |
| 1423138_at                   | WD repeat domain 4                                                                                                                                                                                                                                                                                                                                                                                                                                                                                                                                                                                                                          | 7             |
| 1428629_at                   | zinc finger protein 518                                                                                                                                                                                                                                                                                                                                                                                                                                                                                                                                                                                                                     | 7             |
| 1424670_s_at                 | zinc finger, FYVE domain containing 21                                                                                                                                                                                                                                                                                                                                                                                                                                                                                                                                                                                                      | 7             |

| CLUSTER 4                    |                                                                                              |               |
|------------------------------|----------------------------------------------------------------------------------------------|---------------|
| AFFYMETRIX_3P<br>RIME_IVT_ID | Name                                                                                         | Peak<br>phase |
| 1434087_at                   | 5,10-methylenetetrahydrofolate reductase                                                     | 23            |
| 1452595_at                   | a disintegrin-like and metallopeptidase (repolysin type) with thrombospondin type 1 motif, 4 | 23            |
| 1455965_at                   | a disintegrin-like and metallopeptidase (repolysin type) with thrombospondin type 1 motif, 4 | 23            |
| 1425099_a_at                 | aryl hydrocarbon receptor nuclear translocator-like                                          | 19            |
| 1428982_at                   | ATPase family, AAA domain containing 2B                                                      | 19            |

| CLUSTER 4 (continued)        |                                                                                          |               |
|------------------------------|------------------------------------------------------------------------------------------|---------------|
| AFFYMETRIX_3P<br>RIME_IVT_ID | Name                                                                                     | Peak<br>phase |
| 1447139_at                   | B-cell CLL/lymphoma 7C                                                                   | 23            |
| 1436960_at                   | bromodomain containing 3                                                                 | 23            |
| 1420907_at                   | CD2-associated protein                                                                   | 23            |
| 1434957_at                   | cell adhesion molecule-related/down-regulated by oncogenes                               | 23            |
| 1418660_at                   | circadian locomoter output cycles kaput                                                  | 19            |
| 1438024_at                   | coiled-coil domain containing 90A                                                        | 23            |
| 1434326_x_at                 | coronin, actin binding protein, 2B                                                       | 19            |
| 1434755_at                   | coronin, actin binding protein, 2B                                                       | 23            |
| 1436914_at                   | CTD (carboxy-terminal domain, RNA polymerase II, polypeptide A) small phosphatase like 2 | 19            |
| 1420617_at                   | cytoplasmic polyadenylation element binding protein 4                                    | 19            |
| 1423042_at                   | DEAD/H (Asp-Glu-Ala-Asp/His) box polypeptide 3, X-linked                                 | 19            |
| 1451453_at                   | death-associated protein kinase 2                                                        | 19            |
| 1419204_at                   | delta-like 1 (Drosophila)                                                                | 23            |
| 1419995_at                   | DNA segment, Chr 10, ERATO Doi 641, expressed                                            | 23            |
| 1439332_at                   | DNA-damage-inducible transcript 4-like                                                   | 23            |
| 1444139_at                   | DNA-damage-inducible transcript 4-like                                                   | 23            |
| 1451751_at                   | DNA-damage-inducible transcript 4-like                                                   | 19            |
| 1420722_at                   | elongation of very long chain fatty acids (FEN1/Elo2, SUR4/Elo3, yeast)-like 3           | 3             |
| 1427069_at                   | F-box protein 28                                                                         | 23            |
| 1437150_at                   | family with sequence similarity 110, member B                                            | 23            |
| 1440359_at                   | family with sequence similarity 110, member B                                            | 23            |
| 1452924_at                   | family with sequence similarity 83, member D                                             | 23            |
| 1460251_at                   | Fas (TNF receptor superfamily member 6)                                                  | 19            |
| 1434699_at                   | G2/M-phase specific E3 ubiquitin ligase                                                  | 23            |
| 1419359_at                   | hexamethylene bis-acetamide inducible 1                                                  | 19            |
| 1418415_at                   | homeo box B5                                                                             | 23            |
| 1438274_at                   | IKAROS family zinc finger 4; similar to helios                                           | 23            |
| 1417612_at                   | immediate early response 5                                                               | 23            |
| 1422053_at                   | inhibin beta-A                                                                           | 19            |
| 1435465_at                   | kelch repeat and BTB (POZ) domain containing 11                                          | 23            |
| 1424594_at                   | lectin, galactose binding, soluble 7                                                     | 3             |
| 1436356_at                   | lectin, galactose binding, soluble 7                                                     | 19            |
| 1455293_at                   | Leo1, Paf1/RNA polymerase II complex component, homolog (S. cerevisiae)                  | 23            |
| 1434424_at                   | major facilitator superfamily domain containing 7B                                       | 3             |
| 1424180_a_at                 | mediator complex subunit 24                                                              | 23            |
| 1437404_at                   | microtubule associated serine/threonine kinase family member 4                           | 23            |
| 1416733_at                   | muskelin 1, intracellular mediator containing kelch motifs                               | 23            |
| 1426717_at                   | non imprinted in Prader-Willi/Angelman syndrome 2 homolog (human)                        | 23            |
| 1447905_x_at                 | nucleoporin 62                                                                           | 19            |
| 1459441_at                   | odd Oz/ten-m homolog 3 (Drosophila)                                                      | 3             |
| 1418302_at                   | palmitoyl-protein thioesterase 2                                                         | 23            |
| 1435562_at                   | PDZ domain containing 8                                                                  | 23            |
| 1416846_a_at                 | PDZ domain containing RING finger 3                                                      | 19            |
| 1435066_at                   | phosphatidylinositol transfer protein, cytoplasmic 1                                     | 23            |
| 1455204_at                   | phosphatidylinositol transfer protein, cytoplasmic 1                                     | 23            |
| 1415806_at                   | plasminogen activator, tissue                                                            | 19            |
| 1455271_at                   | predicted gene 13889                                                                     | 23            |
| 1428615_at                   | purinergic receptor P2Y, G-protein coupled, 5                                            | 19            |
| 1418892_at                   | ras homolog gene family, member J                                                        | 19            |
| 1428227_at                   | RE1-silencing transcription factor                                                       | 23            |
| 1448689_at                   | related RAS viral (r-ras) oncogene homolog 2                                             | 19            |
| 1424163_at                   | required for meiotic nuclear division 5 homolog B (S. cerevisiae)                        | 3             |
| 1427522_at                   | Rho GTPase activating protein 20                                                         | 23            |
| 1429918_at                   | Rho GTPase activating protein 20                                                         | 19            |
| 1454745_at                   | Rho GTPase activating protein 29                                                         | 19            |
| 1424318_at                   | RIKEN cDNA 1110067D22 gene                                                               | 23            |
| 1440062_at                   | RIKEN cDNA 2510009E07 gene                                                               | 23            |
| 1429451_at                   | RIKEN cDNA 2610301B20 gene                                                               | 23            |
| 1442307_at                   | RIKEN cDNA B130063F10 gene                                                               | 23            |
| 1448005_at                   | SAM and SH3 domain containing 1; predicted gene 2082                                     | 23            |
| 1445957_at                   | similar to Ena-VASP-like; Ena-vasodilator stimulated phosphoprotein                      | 19            |
| 1434521_at                   | similar to regulatory factor X domain containing 2 homolog; regulatory factor X, 7       | 23            |
| 1415802_at                   | solute carrier family 16 (monocarboxylic acid transporters), member 1                    | 3             |
| 1434096_at                   | solute carrier family 4 (anion exchanger), member 4                                      | 23            |
| 1452071_at                   | solute carrier family 4 (anion exchanger), member 4                                      | 23            |
| 1438673_at                   | solute carrier family 4, sodium bicarbonate cotransporter, member 7                      | 19            |
| 1417061_at                   | solute carrier family 40 (iron-regulated transporter), member 1                          | 23            |
| 1457686_at                   | splicing factor, arginine/serine-rich 17b                                                | 23            |
| 1436584_at                   | sprouty homolog 2 (Drosophila)                                                           | 19            |
| 1419155_a_at                 | SRY-box containing gene 19; SRY-box containing gene 4                                    | 23            |

| CLUSTER 4 (continued)        |                                                                          |               |
|------------------------------|--------------------------------------------------------------------------|---------------|
| AFFYMETRIX_3P<br>RIME_IVT_ID | Name                                                                     | Peak<br>phase |
| 1419156_at                   | SRY-box containing gene 19; SRY-box containing gene 4                    | 23            |
| 1449370_at                   | SRY-box containing gene 19; SRY-box containing gene 4                    | 23            |
| 1428831_at                   | SUMO/sentrin specific peptidase 5                                        | 3             |
| 1421594_a_at                 | synaptotagmin-like 2                                                     | 23            |
| 1421529_a_at                 | thioredoxin reductase 1                                                  | 23            |
| 1419132_at                   | toll-like receptor 2                                                     | 23            |
| 1456009_x_at                 | topoisomerase (DNA) III beta                                             | 23            |
| 1428108_x_at                 | transmembrane and coiled-coil domains 2                                  | 23            |
| 1454730_at                   | transmembrane anterior posterior transformation 1                        | 19            |
| 1433735_a_at                 | transmembrane protein 64                                                 | 23            |
| 1428281_at                   | TruB pseudouridine (psi) synthase homolog 1 (E. coli)                    | 19            |
| 1449033_at                   | tumor necrosis factor receptor superfamily, member 11b (osteoprotegerin) | 23            |
| 1418571_at                   | tumor necrosis factor receptor superfamily, member 12a                   | 3             |
| 1418572_x_at                 | tumor necrosis factor receptor superfamily, member 12a                   | 3             |
| 1442590_at                   | tumor necrosis factor receptor superfamily, member 23                    | 23            |
| 1436308_at                   | zinc finger protein 292                                                  | 23            |

| CLUSTER 5                    |                                                                              |               |
|------------------------------|------------------------------------------------------------------------------|---------------|
| AFFYMETRIX_3P<br>RIME_IVT_ID | Name                                                                         | Peak<br>phase |
| 1443968_at                   | adenosine deaminase, RNA-specific, B1                                        | 15            |
| 1423420_at                   | adrenergic receptor, beta 1                                                  | 11            |
| 1416077_at                   | adrenomedullin                                                               | 11            |
| 1447839_x_at                 | adrenomedullin                                                               | 11            |
| 1418901_at                   | CCAAT/enhancer binding protein (C/EBP), beta                                 | 15            |
| 1427844_a_at                 | CCAAT/enhancer binding protein (C/EBP), beta                                 | 15            |
| 1458040_at                   | cerberus 1 homolog (Xenopus laevis)                                          | 15            |
| 1450488_at                   | chemokine (C-C motif) ligand 24                                              | 11            |
| 1416953_at                   | connective tissue growth factor                                              | 15            |
| 1416537_at                   | cysteine-rich with EGF-like domains 1                                        | 15            |
| 1437763_at                   | DCN1, defective in cullin neddylation 1, domain containing 3 (S. cerevisiae) | 15            |
| 1447462_at                   | DNA segment, Chr 7, Wayne State University 130, expressed                    | 15            |
| 1431422_a_at                 | dual specificity phosphatase 14                                              | 15            |
| 1434944_at                   | dystrophia myotonica-protein kinase                                          | 11            |
| 1437829_s_at                 | eukaryotic elongation factor-2 kinase                                        | 15            |
| 1439860_at                   | eukaryotic elongation factor-2 kinase                                        | 15            |
| 1449013_at                   | eukaryotic elongation factor-2 kinase                                        | 11            |
| 1434414_at                   | FAD-dependent oxidoreductase domain containing 2                             | 11            |
| 1451099_at                   | family with sequence similarity 62 (C2 domain containing), member A          | 15            |
| 1441042_at                   | fibroblast growth factor 1                                                   | 15            |
| 1416125_at                   | FK506 binding protein 5                                                      | 15            |
| 1448231_at                   | FK506 binding protein 5                                                      | 11            |
| 1417429_at                   | flavin containing monooxygenase 1                                            | 11            |
| 1437408_at                   | G protein-coupled receptor 126                                               | 15            |
| 1418483_a_at                 | glycoprotein galactosyltransferase alpha 1, 3                                | 11            |
| 1451843_a_at                 | glycoprotein galactosyltransferase alpha 1, 3                                | 15            |
| 1434735_at                   | hepatic leukemia factor                                                      | 11            |
| 1434736_at                   | hepatic leukemia factor                                                      | 11            |
| 1428584_a_at                 | hydroxyacylglutathione hydrolase-like                                        | 7             |
| 1460675_at                   | immunoglobulin superfamily, member 8                                         | 19            |
| 1436987_at                   | isthmin 1 homolog (zebrafish)                                                | 15            |
| 1436988_at                   | isthmin 1 homolog (zebrafish)                                                | 15            |
| 1444165_at                   | layilin                                                                      | 11            |
| 1421101_a_at                 | LIM domain binding 2                                                         | 11            |
| 1439557_s_at                 | LIM domain binding 2                                                         | 11            |
| 1455665_at                   | LON peptidase N-terminal domain and ring finger 1                            | 11            |
| 1436830_at                   | MARVEL (membrane-associating) domain containing 1                            | 15            |
| 1449901_a_at                 | mitogen-activated protein kinase kinase kinase 6                             | 15            |
| 1417663_a_at                 | N-myc downstream regulated gene 3                                            | 11            |
| 1428393_at                   | neuritin 1                                                                   | 11            |
| 1433907_at                   | Pbx/knotted 1 homeobox 2                                                     | 11            |
| 1449851_at                   | period homolog 1 (Drosophila)                                                | 15            |
| 1417602_at                   | period homolog 2 (Drosophila)                                                | 15            |
| 1457350_at                   | period homolog 2 (Drosophila)                                                | 11            |
| 1421087_at                   | period homolog 3 (Drosophila)                                                | 15            |
| 1455345_at                   | PHD finger protein 15                                                        | 15            |
| 1430966_at                   | predicted gene 4477; camello-like 3                                          | 15            |
| 1425328_at                   | predicted gene 7527; family with sequence similarity 76, member A            | 19            |
| 1460674_at                   | progesterin and adipoQ receptor family member VII                            | 11            |
| 1451576_at                   | protein kinase, DNA activated, catalytic polypeptide                         | 15            |



| CLUSTER 5 (continued)        |                                                                                                               |               |
|------------------------------|---------------------------------------------------------------------------------------------------------------|---------------|
| AFFYMETRIX_3P<br>RIME_IVT_ID | Name                                                                                                          | Peak<br>phase |
| 1427929_a_at                 | pyridoxal (pyridoxine, vitamin B6) kinase                                                                     | 11            |
| 1442067_at                   | receptor tyrosine kinase-like orphan receptor 1                                                               | 15            |
| 1451171_at                   | RIKEN cDNA 2310008H04 gene                                                                                    | 15            |
| 1457438_at                   | RIKEN cDNA 2310030N02 gene                                                                                    | 11            |
| 1436673_at                   | RIKEN cDNA 2610020H08 gene                                                                                    | 15            |
| 1441799_at                   | RIKEN cDNA 6030422H21 gene                                                                                    | 15            |
| 1436316_at                   | RIKEN cDNA 9430029L20 gene                                                                                    | 15            |
| 1426792_s_at                 | RUN and SH3 domain containing 2                                                                               | 7             |
| 1419766_at                   | salt inducible kinase 1                                                                                       | 15            |
| 1420588_at                   | serine protease inhibitor-like, with Kunitz and WAP domains 1 (eppin)                                         | 11            |
| 1439802_at                   | serine/threonine kinase 35                                                                                    | 15            |
| 1456640_at                   | SH3 domain containing ring finger 2                                                                           | 15            |
| 1455794_at                   | smoothelin-like 2                                                                                             | 11            |
| 1420150_at                   | splA/ryanodine receptor domain and SOCS box containing 1                                                      | 15            |
| 1428472_at                   | splA/ryanodine receptor domain and SOCS box containing 1                                                      | 15            |
| 1449752_at                   | splA/ryanodine receptor domain and SOCS box containing 1                                                      | 11            |
| 1434963_at                   | suppressor of Ty 3 homolog (S. cerevisiae)                                                                    | 11            |
| 1425484_at                   | thymocyte selection-associated high mobility group box; similar to thymus high mobility group box protein TOX | 11            |
| 1442039_at                   | thymocyte selection-associated high mobility group box; similar to thymus high mobility group box protein TOX | 11            |
| 1455109_at                   | transducin (beta)-like 1X-linked receptor 1                                                                   | 15            |
| 1418158_at                   | transformation related protein 63                                                                             | 15            |
| 1420772_a_at                 | TSC22 domain family, member 3                                                                                 | 11            |
| 1425281_a_at                 | TSC22 domain family, member 3                                                                                 | 11            |
| 1433699_at                   | tumor necrosis factor, alpha-induced protein 3                                                                | 15            |
| 1428731_at                   | ubiquitin specific peptidase 54                                                                               | 15            |
| 1416773_at                   | WEE 1 homolog 1 (S. pombe)                                                                                    | 15            |
| 1416774_at                   | WEE 1 homolog 1 (S. pombe)                                                                                    | 11            |
| 1419874_x_at                 | zinc finger and BTB domain containing 16                                                                      | 15            |
| 1439163_at                   | zinc finger and BTB domain containing 16                                                                      | 15            |
| 1442025_a_at                 | zinc finger and BTB domain containing 16                                                                      | 15            |
| 1442026_at                   | zinc finger and BTB domain containing 16                                                                      | 15            |
| 1459557_at                   | zinc finger and BTB domain containing 16                                                                      | 7             |

| CLUSTER 6                    |                                                                                                |               |
|------------------------------|------------------------------------------------------------------------------------------------|---------------|
| AFFYMETRIX_3P<br>RIME_IVT_ID | Name                                                                                           | Peak<br>phase |
| 1456901_at                   | a disintegrin-like and metallopeptidase (reprolysin type) with thrombospondin type 1 motif, 20 | 19            |
| 1418382_at                   | adenomatosis polyposis coli down-regulated 1                                                   | 19            |
| 1418383_at                   | adenomatosis polyposis coli down-regulated 1                                                   | 19            |
| 1437604_x_at                 | adenomatosis polyposis coli down-regulated 1                                                   | 15            |
| 1449070_x_at                 | adenomatosis polyposis coli down-regulated 1                                                   | 19            |
| 1434932_at                   | adenosine deaminase, RNA-specific, B1                                                          | 15            |
| 1460020_at                   | ankyrin repeat domain 11                                                                       | 19            |
| 1424712_at                   | AT hook containing transcription factor 1                                                      | 19            |
| 1452929_at                   | CAP-GLY domain containing linker protein 1                                                     | 15            |
| 1434565_at                   | cell growth regulator with ring finger domain 1                                                | 19            |
| 1433733_a_at                 | cryptochrome 1 (photolyase-like)                                                               | 23            |
| 1435975_at                   | DENN/MADD domain containing 4A                                                                 | 19            |
| 1453027_at                   | discs, large (Drosophila) homolog-associated protein 1                                         | 15            |
| 1419353_at                   | dolichol-phosphate (beta-D) mannosyltransferase 1                                              | 15            |
| 1428222_at                   | doublecortin-like kinase 2                                                                     | 15            |
| 1429250_at                   | dynein cytoplasmic 2 heavy chain 1                                                             | 19            |
| 1417235_at                   | EH-domain containing 3                                                                         | 19            |
| 1435719_at                   | expressed sequence AI448984                                                                    | 15            |
| 1435280_at                   | expressed sequence AI452195                                                                    | 15            |
| 1459504_at                   | expressed sequence AU022121                                                                    | 15            |
| 1457442_at                   | expressed sequence AW125324                                                                    | 15            |
| 1445049_at                   | expressed sequence C80893                                                                      | 15            |
| 1436580_at                   | heparan-alpha-glucosaminide N-acetyltransferase                                                | 15            |
| 1428373_at                   | hypothetical protein LOC100044300; inositol hexaphosphate kinase 2                             | 19            |
| 1419128_at                   | integrin alpha X                                                                               | 19            |
| 1424259_at                   | lipase maturation factor 1                                                                     | 19            |
| 1434690_at                   | lysocardiolipin acyltransferase 1                                                              | 15            |
| 1452188_at                   | mastermind like 1 (Drosophila)                                                                 | 19            |
| 1434698_at                   | melanoma inhibitory activity 3                                                                 | 15            |
| 1436502_at                   | mitochondrial tumor suppressor 1                                                               | 19            |
| 1440609_at                   | mitogen-activated protein kinase kinase kinase kinase 4                                        | 19            |
| 1450511_at                   | muscle, skeletal, receptor tyrosine kinase                                                     | 15            |
| 1429049_at                   | NUAK family, SNF1-like kinase, 2                                                               | 15            |
| 1435771_at                   | phospholipase C, beta 4                                                                        | 19            |

| CLUSTER 6 (continued)        |                                                                                                                                                               |               |
|------------------------------|---------------------------------------------------------------------------------------------------------------------------------------------------------------|---------------|
| AFFYMETRIX_3P<br>RIME_IVT_ID | Name                                                                                                                                                          | Peak<br>phase |
| 1458553_at                   | plasminogen activator, tissue                                                                                                                                 | 15            |
| 1456066_a_at                 | polymerase (RNA) I polypeptide A                                                                                                                              | 15            |
| 1421760_at                   | pre T-cell antigen receptor alpha                                                                                                                             | 15            |
| 1449607_at                   | predicted gene 4210                                                                                                                                           | 15            |
| 1420304_x_at                 | predicted gene 4833; predicted gene 9616; predicted gene 13680; predicted gene 4859; predicted gene 8729; predicted gene 8231; ribosomal protein S4, X-linked | 15            |
| 1451264_at                   | predicted gene 5780; FERM domain containing 6                                                                                                                 | 19            |
| 1430735_at                   | protein associated with topoisomerase II homolog 2 (yeast)                                                                                                    | 19            |
| 1424886_at                   | protein tyrosine phosphatase, receptor type, D                                                                                                                | 15            |
| 1435537_at                   | protein tyrosine phosphatase, receptor type, D                                                                                                                | 15            |
| 1451253_at                   | PX domain containing serine/threonine kinase; similar to PX domain-containing protein kinase-like protein (Modulator of Na,K-ATPase) (MONaKA)                 | 19            |
| 1434062_at                   | RAB GTPase activating protein 1-like                                                                                                                          | 19            |
| 1452833_at                   | Rap guanine nucleotide exchange factor (GEF) 2                                                                                                                | 15            |
| 1424034_at                   | RAR-related orphan receptor alpha                                                                                                                             | 15            |
| 1458145_at                   | RAR-related orphan receptor alpha                                                                                                                             | 19            |
| 1436059_at                   | regulatory factor X, 1 (influences HLA class II expression)                                                                                                   | 19            |
| 1433161_at                   | RIKEN cDNA 1700008N17 gene                                                                                                                                    | 15            |
| 1437654_at                   | RIKEN cDNA 3110001K24 gene                                                                                                                                    | 19            |
| 1453976_at                   | RIKEN cDNA 4432414F05 gene                                                                                                                                    | 19            |
| 1441338_at                   | RIKEN cDNA 5930412G12 gene                                                                                                                                    | 15            |
| 1458371_at                   | RIKEN cDNA E130006N16 gene                                                                                                                                    | 19            |
| 1449944_a_at                 | Sec61, alpha subunit 2 ( <i>S. cerevisiae</i> )                                                                                                               | 15            |
| 1416168_at                   | serine (or cysteine) peptidase inhibitor, clade F, member 1                                                                                                   | 15            |
| 1455437_at                   | similar to Serine/threonine-protein kinase QSK; cDNA sequence BC033915                                                                                        | 19            |
| 1420762_a_at                 | similar to Y box protein 2; Y box protein 2                                                                                                                   | 15            |
| 1426109_a_at                 | solute carrier family 14 (urea transporter), member 2                                                                                                         | 15            |
| 1426595_at                   | solute carrier family 18 (vesicular monoamine), member 1                                                                                                      | 19            |
| 1426069_s_at                 | solute carrier family 7 (cationic amino acid transporter, y+ system), member 4                                                                                | 19            |
| 1437924_at                   | Son DNA binding protein                                                                                                                                       | 19            |
| 1422822_at                   | StAR-related lipid transfer (START) domain containing 5                                                                                                       | 19            |
| 1450769_s_at                 | StAR-related lipid transfer (START) domain containing 5                                                                                                       | 19            |
| 1455171_at                   | suppressor of variegation 4-20 homolog 1 ( <i>Drosophila</i> )                                                                                                | 19            |
| 1433778_at                   | tankyrase, TRF1-interacting ankyrin-related ADP-ribose polymerase                                                                                             | 15            |
| 1435350_at                   | TNF receptor-associated factor 6                                                                                                                              | 19            |
| 1443288_at                   | TNF receptor-associated factor 6                                                                                                                              | 19            |
| 1433795_at                   | transforming growth factor, beta receptor III                                                                                                                 | 15            |
| 1456583_x_at                 | transmembrane protein 144                                                                                                                                     | 15            |
| 1445693_at                   | v-raf murine sarcoma 3611 viral oncogene homolog                                                                                                              | 19            |
| 1426776_at                   | Wiskott-Aldrich syndrome-like (human)                                                                                                                         | 19            |
| 1437023_at                   | zinc finger protein 12                                                                                                                                        | 19            |
| 1457552_at                   | zinc finger protein 295                                                                                                                                       | 19            |
| 1419787_a_at                 | zinc finger protein 628                                                                                                                                       | 15            |
| 1460441_at                   | zinc finger, X-linked, duplicated B                                                                                                                           | 19            |

| CLUSTER 7                    |                                                                                                                                      |               |
|------------------------------|--------------------------------------------------------------------------------------------------------------------------------------|---------------|
| AFFYMETRIX_3P<br>RIME_IVT_ID | Name                                                                                                                                 | Peak<br>phase |
| 1433477_at                   | active BCR-related gene                                                                                                              | 23            |
| 1435880_at                   | ankyrin repeat domain 50                                                                                                             | 19            |
| 1452632_at                   | AP2 associated kinase 1                                                                                                              | 19            |
| 1415813_at                   | apoptosis inhibitor 5                                                                                                                | 19            |
| 1434506_at                   | AT rich interactive domain 2 (ARID, RFX-like); RIKEN cDNA 1700124K17 gene                                                            | 19            |
| 1424702_a_at                 | ATG2 autophagy related 2 homolog B ( <i>S. cerevisiae</i> )                                                                          | 19            |
| 1435501_at                   | ATG2 autophagy related 2 homolog B ( <i>S. cerevisiae</i> )                                                                          | 15            |
| 1436174_at                   | ATPase family, AAA domain containing 2                                                                                               | 23            |
| 1426083_a_at                 | B-cell translocation gene 1, anti-proliferative; similar to myocardial vascular inhibition factor                                    | 19            |
| 1448953_at                   | Bloom syndrome homolog (human)                                                                                                       | 23            |
| 1458755_at                   | cell adhesion molecule-related/down-regulated by oncogenes                                                                           | 19            |
| 1434270_at                   | chromobox homolog 6; neuronal pentraxin receptor; Cbx6-Nptxr readthrough transcripts                                                 | 15            |
| 1456280_at                   | claspin homolog ( <i>Xenopus laevis</i> )                                                                                            | 19            |
| 1419430_at                   | cytochrome P450, family 26, subfamily a, polypeptide 1                                                                               | 19            |
| 1420618_at                   | cytoplasmic polyadenylation element binding protein 4                                                                                | 23            |
| 1419270_a_at                 | deoxyuridine triphosphatase                                                                                                          | 19            |
| 1428299_at                   | dual-specificity tyrosine-(Y)-phosphorylation regulated kinase 1a; dual-specificity tyrosine-(Y)-phosphorylation regulated kinase 1c | 19            |
| 1417730_at                   | exostoses (multiple) 1                                                                                                               | 19            |
| 1454002_at                   | F-box and WD-40 domain protein 2; possible far 3' UTR of Fbxw2                                                                       | 19            |
| 1434002_at                   | forkhead box N3                                                                                                                      | 19            |
| 1434086_at                   | G protein-coupled receptor 107; hypothetical protein LOC100047589                                                                    | 23            |

**CLUSTER 7 (continued)**

| <b>AFFYMETRIX_3P<br/>RIME_IVT_ID</b> | <b>Name</b>                                                                                                                                                                                                           | <b>Peak<br/>phase</b> |
|--------------------------------------|-----------------------------------------------------------------------------------------------------------------------------------------------------------------------------------------------------------------------|-----------------------|
| 1437474_at                           | GATA zinc finger domain containing 2B                                                                                                                                                                                 | 23                    |
| 1440238_at                           | glioma tumor suppressor candidate region gene 1                                                                                                                                                                       | 23                    |
| 1421436_at                           | glutamate receptor, ionotropic, delta 2                                                                                                                                                                               | 23                    |
| 1448926_at                           | homeo box A5                                                                                                                                                                                                          | 19                    |
| 1444010_at                           | hypothetical LOC630527; eukaryotic translation initiation factor 4E; similar to eukaryotic translation initiation factor 4E                                                                                           | 19                    |
| 1433891_at                           | leucine-rich repeat-containing G protein-coupled receptor 4                                                                                                                                                           | 19                    |
| 1450207_at                           | leukemia inhibitory factor receptor                                                                                                                                                                                   | 19                    |
| 1460249_at                           | ligand of numb-protein X 2                                                                                                                                                                                            | 19                    |
| 1429863_at                           | LON peptidase N-terminal domain and ring finger 3                                                                                                                                                                     | 19                    |
| 1426769_s_at                         | mastermind like 1 (Drosophila)                                                                                                                                                                                        | 19                    |
| 1434562_at                           | microfibrillar-associated protein 3                                                                                                                                                                                   | 23                    |
| 1455117_at                           | minichromosome maintenance complex component 9                                                                                                                                                                        | 19                    |
| 1423699_at                           | non-SMC condensin II complex, subunit H2                                                                                                                                                                              | 19                    |
| 1443846_x_at                         | pantothenate kinase 2 (Hallervorden-Spatz syndrome)                                                                                                                                                                   | 19                    |
| 1426994_at                           | PH domain and leucine rich repeat protein phosphatase 1                                                                                                                                                               | 19                    |
| 1418835_at                           | pleckstrin homology-like domain, family A, member 1                                                                                                                                                                   | 19                    |
| 1450443_at                           | polypyrimidine tract binding protein 1; predicted gene 4900                                                                                                                                                           | 19                    |
| 1437419_at                           | predicted gene 4521; BMP2 inducible kinase                                                                                                                                                                            | 19                    |
| 1425333_at                           | RAB43, member RAS oncogene family                                                                                                                                                                                     | 19                    |
| 1433900_at                           | RIKEN cDNA 0610007L01 gene                                                                                                                                                                                            | 19                    |
| 1459967_at                           | RIKEN cDNA 1810063B05 gene                                                                                                                                                                                            | 19                    |
| 1428561_at                           | RIKEN cDNA 2610002J23 gene                                                                                                                                                                                            | 19                    |
| 1440849_at                           | RIKEN cDNA 6330417G04 gene                                                                                                                                                                                            | 19                    |
| 1455680_at                           | RIKEN cDNA 9630025H16 gene                                                                                                                                                                                            | 19                    |
| 1455554_at                           | RIKEN cDNA A830039N20 gene                                                                                                                                                                                            | 15                    |
| 1425282_at                           | ring finger protein 144B                                                                                                                                                                                              | 19                    |
| 1424588_at                           | SLIT-ROBO Rho GTPase activating protein 3                                                                                                                                                                             | 23                    |
| 1438187_at                           | solute carrier family 25 (mitochondrial carrier, palmitoylcarnitine transporter), member 29                                                                                                                           | 15                    |
| 1438188_x_at                         | solute carrier family 25 (mitochondrial carrier, palmitoylcarnitine transporter), member 29                                                                                                                           | 15                    |
| 1433595_at                           | solute carrier family 35 (UDP-glucuronic acid/UDP-N-acetylgalactosamine dual transporter), member D1; similar to solute carrier family 35 (UDP-glucuronic acid/UDP-N-acetylgalactosamine dual transporter), member D1 | 19                    |
| 1434104_at                           | solute carrier family 35, member E1                                                                                                                                                                                   | 19                    |
| 1416359_at                           | sorting nexin 18                                                                                                                                                                                                      | 19                    |
| 1429029_at                           | sphingomyelin synthase 2                                                                                                                                                                                              | 19                    |
| 1434966_at                           | splicing factor, arginine/serine-rich 8                                                                                                                                                                               | 23                    |
| 1422571_at                           | thrombospondin 2                                                                                                                                                                                                      | 23                    |
| 1449388_at                           | thrombospondin 4                                                                                                                                                                                                      | 19                    |
| 1435344_at                           | transcription factor Dp 2                                                                                                                                                                                             | 19                    |
| 1421096_at                           | transient receptor potential cation channel, subfamily C, member 1                                                                                                                                                    | 19                    |
| 1434500_at                           | tweety homolog 2 (Drosophila); similar to tweety homolog 2                                                                                                                                                            | 19                    |
| 1434901_at                           | zinc finger and BTB domain containing 2; predicted gene 13294                                                                                                                                                         | 23                    |
| 1437111_at                           | zinc finger CCCH type containing 12C                                                                                                                                                                                  | 19                    |
| 1424892_at                           | zinc finger with KRAB and SCAN domains 5                                                                                                                                                                              | 19                    |

**CLUSTER 8**

| <b>AFFYMETRIX_3P<br/>RIME_IVT_ID</b> | <b>Name</b>                                                                         | <b>Peak<br/>phase</b> |
|--------------------------------------|-------------------------------------------------------------------------------------|-----------------------|
| 1416137_at                           | annexin A7                                                                          | 11                    |
| 1416138_at                           | annexin A7                                                                          | 11                    |
| 1418025_at                           | basic helix-loop-helix family, member e40                                           | 11                    |
| 1417161_at                           | CDK2-associated protein 2                                                           | 11                    |
| 1436195_at                           | cDNA sequence BC046404; similar to CDNA sequence BC046404                           | 7                     |
| 1427030_at                           | coiled-coil domain containing 52                                                    | 7                     |
| 1455821_x_at                         | complement component 1, q subcomponent binding protein                              | 11                    |
| 1418174_at                           | D site albumin promoter binding protein                                             | 7                     |
| 1438211_s_at                         | D site albumin promoter binding protein                                             | 7                     |
| 1420512_at                           | dickkopf homolog 2 (Xenopus laevis)                                                 | 7                     |
| 1415691_at                           | discs, large homolog 1 (Drosophila); similar to Discs, large homolog 1 (Drosophila) | 11                    |
| 1419978_s_at                         | DNA segment, Chr 10, ERATO Doi 610, expressed                                       | 7                     |
| 1427043_s_at                         | ecto-NOX disulfide-thiol exchanger 2                                                | 11                    |
| 1424157_at                           | EH-domain containing 2                                                              | 7                     |
| 1448491_at                           | enoyl coenzyme A hydratase 1, peroxisomal                                           | 11                    |
| 1435547_at                           | ENSMUSG00000075401                                                                  | 7                     |
| 1454021_a_at                         | exosome component 10                                                                | 15                    |
| 1455428_at                           | family with sequence similarity 53, member B                                        | 7                     |
| 1450694_at                           | FK506 binding protein 2                                                             | 11                    |
| 1448559_at                           | flotillin 1                                                                         | 7                     |
| 1417220_at                           | fumarylacetoacetate hydrolase                                                       | 7                     |
| 1428767_at                           | gasdermin D                                                                         | 7                     |

| CLUSTER 8 (continued)        |                                                                                             |               |
|------------------------------|---------------------------------------------------------------------------------------------|---------------|
| AFFYMETRIX_3P<br>RIME_IVT_ID | Name                                                                                        | Peak<br>phase |
| 1428630_x_at                 | hydroxyacylglutathione hydrolase-like                                                       | 11            |
| 1417886_at                   | hypothetical protein LOC100048454; RIKEN cDNA 1810009A15 gene                               | 11            |
| 1428487_s_at                 | hypothetical protein LOC675736; coenzyme Q10 homolog B (S. cerevisiae); predicted gene 4899 | 11            |
| 1418125_at                   | INO80 homolog (S. cerevisiae); similar to yeast INO80-like protein                          | 7             |
| 1449942_a_at                 | integrin linked kinase; predicted gene 6263                                                 | 7             |
| 1451016_at                   | interferon-related developmental regulator 2                                                | 11            |
| 1434541_x_at                 | KH domain containing, RNA binding, signal transduction associated 1                         | 7             |
| 1437389_x_at                 | KH domain containing, RNA binding, signal transduction associated 1                         | 7             |
| 1438462_x_at                 | KH domain containing, RNA binding, signal transduction associated 1                         | 7             |
| 1460559_at                   | KN motif and ankyrin repeat domains 2                                                       | 7             |
| 1448839_at                   | KN motif and ankyrin repeat domains 3                                                       | 11            |
| 1417638_at                   | left right determination factor 1                                                           | 11            |
| 1417592_at                   | mechanistic target of rapamycin (serine/threonine kinase)                                   | 7             |
| 1440209_at                   | membrane-associated ring finger (C3HC4) 1                                                   | 11            |
| 1448486_at                   | methylmalonyl-Coenzyme A mutase                                                             | 11            |
| 1428709_a_at                 | mitochondrial ribosomal protein L24                                                         | 11            |
| 1451555_at                   | neurolysin (metallopeptidase M3 family)                                                     | 7             |
| 1454748_at                   | nicotinate phosphoribosyltransferase domain containing 1                                    | 7             |
| 1416958_at                   | nuclear receptor subfamily 1, group D, member 2; predicted gene 5827                        | 11            |
| 1457250_x_at                 | nuclear receptor subfamily 1, group D, member 2; predicted gene 5827                        | 11            |
| 1451974_at                   | oxysterol binding protein-like 2                                                            | 7             |
| 1441445_at                   | period homolog 3 (Drosophila)                                                               | 7             |
| 1442243_at                   | period homolog 3 (Drosophila)                                                               | 7             |
| 1458176_at                   | period homolog 3 (Drosophila)                                                               | 7             |
| 1454832_at                   | phosphatase and actin regulator 1                                                           | 11            |
| 1456606_a_at                 | phosphatase and actin regulator 1                                                           | 11            |
| 1435945_a_at                 | potassium intermediate/small conductance calcium-activated channel, subfamily N, member 4   | 7             |
| 1435188_at                   | predicted gene 129                                                                          | 11            |
| 1437449_at                   | radical S-adenosyl methionine domain containing 1                                           | 7             |
| 1433867_at                   | RIKEN cDNA 1810030O07 gene                                                                  | 7             |
| 1457826_a_at                 | RIKEN cDNA 1810043H04 gene                                                                  | 7             |
| 1418245_a_at                 | RNA binding motif protein 9                                                                 | 7             |
| 1419149_at                   | serine (or cysteine) peptidase inhibitor, clade E, member 1                                 | 11            |
| 1423851_a_at                 | shisa homolog 2 (Xenopus laevis)                                                            | 11            |
| 1423852_at                   | shisa homolog 2 (Xenopus laevis)                                                            | 11            |
| 1419649_s_at                 | similar to nuclear myosin I beta; myosin IC                                                 | 7             |
| 1435860_at                   | solute carrier family 5 (sodium-dependent vitamin transporter), member 6                    | 7             |
| 1426230_at                   | sphingosine kinase 2                                                                        | 11            |
| 1451573_a_at                 | syntaxin 4A (placental)                                                                     | 11            |
| 1423888_at                   | TEL2, telomere maintenance 2, homolog (S. cerevisiae)                                       | 7             |
| 1424175_at                   | thyrotroph embryonic factor                                                                 | 7             |
| 1454810_s_at                 | vacuolar protein sorting 8 homolog (S. cerevisiae)                                          | 11            |
| 1444307_at                   | --                                                                                          | 11            |

| CLUSTER 9                    |                                                                      |               |
|------------------------------|----------------------------------------------------------------------|---------------|
| AFFYMETRIX_3P<br>RIME_IVT_ID | Name                                                                 | Peak<br>phase |
| 1454617_at                   | arrestin domain containing 3                                         | 15            |
| 1419393_at                   | ATP-binding cassette, sub-family G (WHITE), member 5                 | 15            |
| 1423999_at                   | c-abl oncogene 1, receptor tyrosine kinase                           | 15            |
| 1455082_at                   | Casitas B-lineage lymphoma b                                         | 19            |
| 1426332_a_at                 | claudin 3                                                            | 15            |
| 1418714_at                   | dual specificity phosphatase 8                                       | 15            |
| 1436866_at                   | ephrin A5                                                            | 15            |
| 1419816_s_at                 | ERBB receptor feedback inhibitor 1                                   | 15            |
| 1422684_a_at                 | exocyst complex component 4                                          | 15            |
| 1422686_s_at                 | exocyst complex component 4                                          | 15            |
| 1459827_x_at                 | Hermansky-Pudlak syndrome 1 homolog (human)                          | 19            |
| 1433634_at                   | interferon regulatory factor 2 binding protein 2                     | 15            |
| 1417409_at                   | Jun oncogene                                                         | 15            |
| 1448694_at                   | Jun oncogene                                                         | 15            |
| 1432543_a_at                 | Kruppel-like factor 13                                               | 15            |
| 1433538_at                   | MARVEL (membrane-associating) domain containing 1                    | 15            |
| 1426979_at                   | MLX interacting protein                                              | 15            |
| 1434384_at                   | nuclear receptor interacting protein 1                               | 15            |
| 1454862_at                   | pleckstrin homology-like domain, family B, member 2                  | 19            |
| 1434496_at                   | polo-like kinase 3 (Drosophila)                                      | 15            |
| 1418414_at                   | potassium voltage-gated channel, subfamily H (eag-related), member 1 | 15            |

**CLUSTER 9 (continued)**

| AFFYMETRIX_3P<br>RIME_IVT_ID | Name                                                                                                                                                                                                                                                                                                                                                                                                                                                                                                                                                                                                                                                                                                                    | Peak<br>phase |
|------------------------------|-------------------------------------------------------------------------------------------------------------------------------------------------------------------------------------------------------------------------------------------------------------------------------------------------------------------------------------------------------------------------------------------------------------------------------------------------------------------------------------------------------------------------------------------------------------------------------------------------------------------------------------------------------------------------------------------------------------------------|---------------|
| 1425966_x_at                 | predicted gene 5928; predicted gene 12617; predicted gene 4802; similar to ribosomal protein S27a; predicted gene 13215; predicted gene 6111; predicted gene 7808; predicted gene 6014; predicted gene 8317; ubiquitin C; ubiquitin B; similar to fusion protein: ubiquitin (bases 43_513); ribosomal protein S27a (bases 217_532); similar to ubiquitin B; predicted gene 8649; ribosomal protein S27A; predicted gene 11517; predicted gene 11808; predicted gene 8430; RIKEN cDNA 2810422J05 gene; similar to Ubc protein; predicted gene 13815; ubiquitin A-52 residue ribosomal protein fusion product 1; predicted gene 8797; predicted gene 1821; predicted gene 11759; predicted gene 5239; predicted gene 6438 | 15            |
| 1432827_x_at                 | predicted gene 5928; predicted gene 12617; predicted gene 4802; similar to ribosomal protein S27a; predicted gene 13215; predicted gene 6111; predicted gene 7808; predicted gene 6014; predicted gene 8317; ubiquitin C; ubiquitin B; similar to fusion protein: ubiquitin (bases 43_513); ribosomal protein S27a (bases 217_532); similar to ubiquitin B; predicted gene 8649; ribosomal protein S27A; predicted gene 11517; predicted gene 11808; predicted gene 8430; RIKEN cDNA 2810422J05 gene; similar to Ubc protein; predicted gene 13815; ubiquitin A-52 residue ribosomal protein fusion product 1; predicted gene 8797; predicted gene 1821; predicted gene 11759; predicted gene 5239; predicted gene 6438 | 15            |
| 1437666_x_at                 | predicted gene 5928; predicted gene 12617; predicted gene 4802; similar to ribosomal protein S27a; predicted gene 13215; predicted gene 6111; predicted gene 7808; predicted gene 6014; predicted gene 8317; ubiquitin C; ubiquitin B; similar to fusion protein: ubiquitin (bases 43_513); ribosomal protein S27a (bases 217_532); similar to ubiquitin B; predicted gene 8649; ribosomal protein S27A; predicted gene 11517; predicted gene 11808; predicted gene 8430; RIKEN cDNA 2810422J05 gene; similar to Ubc protein; predicted gene 13815; ubiquitin A-52 residue ribosomal protein fusion product 1; predicted gene 8797; predicted gene 1821; predicted gene 11759; predicted gene 5239; predicted gene 6438 | 15            |
| 1452127_a_at                 | protein tyrosine phosphatase, non-receptor type 13                                                                                                                                                                                                                                                                                                                                                                                                                                                                                                                                                                                                                                                                      | 19            |
| 1429313_at                   | receptor tyrosine kinase-like orphan receptor 1                                                                                                                                                                                                                                                                                                                                                                                                                                                                                                                                                                                                                                                                         | 15            |
| 1428368_at                   | Rho GTPase activating protein 21                                                                                                                                                                                                                                                                                                                                                                                                                                                                                                                                                                                                                                                                                        | 19            |
| 1447982_at                   | RIKEN cDNA 1110008P14 gene                                                                                                                                                                                                                                                                                                                                                                                                                                                                                                                                                                                                                                                                                              | 15            |
| 1423306_at                   | RIKEN cDNA 2010002N04 gene                                                                                                                                                                                                                                                                                                                                                                                                                                                                                                                                                                                                                                                                                              | 15            |
| 1430003_at                   | RIKEN cDNA 6330412A17 gene                                                                                                                                                                                                                                                                                                                                                                                                                                                                                                                                                                                                                                                                                              | 15            |
| 1445913_at                   | RIKEN cDNA A730090H04 gene                                                                                                                                                                                                                                                                                                                                                                                                                                                                                                                                                                                                                                                                                              | 15            |
| 1416041_at                   | serum/glucocorticoid regulated kinase 1                                                                                                                                                                                                                                                                                                                                                                                                                                                                                                                                                                                                                                                                                 | 15            |
| 1419137_at                   | SH3/ankyrin domain gene 3                                                                                                                                                                                                                                                                                                                                                                                                                                                                                                                                                                                                                                                                                               | 15            |
| 1434530_at                   | similar to DOC4; odd Oz/ten-m homolog 4 (Drosophila)                                                                                                                                                                                                                                                                                                                                                                                                                                                                                                                                                                                                                                                                    | 15            |
| 1448918_at                   | solute carrier organic anion transporter family, member 3a1                                                                                                                                                                                                                                                                                                                                                                                                                                                                                                                                                                                                                                                             | 15            |
| 1422821_s_at                 | StAR-related lipid transfer (START) domain containing 5                                                                                                                                                                                                                                                                                                                                                                                                                                                                                                                                                                                                                                                                 | 19            |
| 1434225_at                   | SWA-70 protein                                                                                                                                                                                                                                                                                                                                                                                                                                                                                                                                                                                                                                                                                                          | 19            |
| 1438206_a_at                 | SYS1 Golgi-localized integral membrane protein homolog (S. cerevisiae)                                                                                                                                                                                                                                                                                                                                                                                                                                                                                                                                                                                                                                                  | 19            |
| 1418559_at                   | testicular serine protease 1                                                                                                                                                                                                                                                                                                                                                                                                                                                                                                                                                                                                                                                                                            | 15            |
| 1421943_at                   | transforming growth factor alpha                                                                                                                                                                                                                                                                                                                                                                                                                                                                                                                                                                                                                                                                                        | 15            |
| 1417611_at                   | transmembrane protein 37                                                                                                                                                                                                                                                                                                                                                                                                                                                                                                                                                                                                                                                                                                | 19            |
| 1460451_at                   | transmembrane protein 52                                                                                                                                                                                                                                                                                                                                                                                                                                                                                                                                                                                                                                                                                                | 15            |
| 1428884_at                   | transmembrane protein 57                                                                                                                                                                                                                                                                                                                                                                                                                                                                                                                                                                                                                                                                                                | 19            |
| 1417168_a_at                 | ubiquitin specific peptidase 2                                                                                                                                                                                                                                                                                                                                                                                                                                                                                                                                                                                                                                                                                          | 15            |
| 1417169_at                   | ubiquitin specific peptidase 2                                                                                                                                                                                                                                                                                                                                                                                                                                                                                                                                                                                                                                                                                          | 15            |
| 1457674_at                   | vacuolar protein sorting 13A (yeast)                                                                                                                                                                                                                                                                                                                                                                                                                                                                                                                                                                                                                                                                                    | 19            |
| 1441069_at                   | zinc finger, DHHC domain containing 23                                                                                                                                                                                                                                                                                                                                                                                                                                                                                                                                                                                                                                                                                  | 15            |

## Supplementary information legends

Gremlin-2 is a BMP antagonist that is regulated by the circadian clock

Ching-Yan Chloé Yeung<sup>1,2</sup>, Nicole Gossan<sup>1,2</sup>, Yinhui Lu<sup>1,2</sup>, Alun Hughes<sup>2</sup>, James J. Hensman<sup>3</sup>,  
Monika L. Bayer<sup>4</sup>, Michael Kjær<sup>4</sup>, Karl E. Kadler<sup>1,2\*</sup> and Qing-Jun Meng<sup>1,2\*</sup>

<sup>1</sup>*Wellcome Trust Centre for Cell-Matrix Research, <sup>2</sup>Faculty of Life Sciences, University of Manchester, Oxford Road, Manchester M13 9PT, United Kingdom,*

<sup>3</sup>*Department of Computer Science, University of Sheffield, Sheffield S1 4DP, United Kingdom,*

<sup>4</sup>*Institute of Sports Medicine, Department of Orthopedic Surgery M, Bispebjerg Hospital, and Center for Healthy Aging, Faculty of Health Sciences, University of Copenhagen, 2400 Copenhagen, Denmark*

**Figure S1. Determination of local false discovery rates (lfdr) for tendon circadian time-course microarray data.** Lfdr was calculated from  $p$ -values (reported by Circwave software) using `fdrtool`. (A) Histogram of  $p$ -values (black line) and the fit of the two-component model (colored lines). (B) Corresponding cumulative density. (C) Calculation of local false discovery rates (both tail- and density-based).  $q$  values were extracted from `fdrtool` and used to assign cut-off point for ‘circadian’ expression.

**Figure S2. Clustering of tendon circadian genes.** Rhythmic genes were organized into nine clusters, based on the time of peak-expression (shown below each pane). Each cluster shows normalized log-expression levels (y-axis) marked as points connected by a thick colored line over time (x-axis), which represents the inferred cluster-wise periodic function, with two standard deviations marked by the shaded area. DD = hours in dark/dark cycle; CT = circadian time. Grey bars represent subjective day; black bars represent subjective night. A complete list of the genes from each cluster can be found in Supplementary Table 2.

**Figure S3. Phase distribution analysis of circadian expressed genes in tendon.** Phase distribution of circadian genes, based on the time point at which maximum expression was detected using microarrays. Numbers in brackets indicate number of probes.

**Figure S4. Full length western blots for Figure 3C.**

**Figure S5. Full length western blots for Figure 4A.**

### Supporting Tables

**Supplementary Table 1. Primers used for qPCR.**

**Supplementary Table 2. List of rhythmic genes in tendon organized into clusters based on peak expression time.**

**Supplementary Video. Real-time bioluminescence microscopy of dissected Achilles tendon from *PER2::Luc* mice.**
